# Supplementary material for: Subtype of Neuroblastoma Cells with High KIT Expression Are Dependent on KIT and Its Knockdown Induces Compensatory Activation of Pro-Survival Signaling
Source: Int J Mol Sci. 2022 Jul 13;23(14):7724. doi: 10.3390/ijms23147724 (PMC9324519; doi:10.3390/ijms23147724)
Supplement: Supplementary file 1 [file ijms-23-07724-s001.zip]

Archive with 6 entries (6 files):
- Supplementary Material Figures.pdf
- Table S1.xlsx
- Table S2.xlsx
- Table S3.xlsx
- Table S4.xlsx
- Table S5.xlsx
