# Supplementary material for: Subtype of Neuroblastoma Cells with High KIT Expression Are Dependent on KIT and Its Knockdown Induces Compensatory Activation of Pro-Survival Signaling
Source: Int J Mol Sci. 2022 Jul 13;23(14):7724. doi: 10.3390/ijms23147724 (PMC9324519; doi:10.3390/ijms23147724)
Supplement: Supplementary file 1 [file ijms-23-07724-s001.zip › Table S1.xlsx]

## Sheet: Sheet1
Dataset	Tumor_type	n_samples	Analysis used	link
ALL (B) - Carroll	Acute lymphoblastic leukemia	98	KIT expression distribution; Immune signatures	https://hgserver1.amc.nl/cgi-bin/r2/main.cgi
ALL (B) - Murphy	Acute lymphoblastic leukemia	207	KIT expression distribution; Immune signatures	https://hgserver1.amc.nl/cgi-bin/r2/main.cgi
ALL (B) Pediatric (combat) - Boer	Acute lymphoblastic leukemia	654	KIT expression distribution; Immune signatures	https://hgserver1.amc.nl/cgi-bin/r2/main.cgi
ALL (Pediatric) - Chen	Acute lymphoblastic leukemia	97	KIT expression distribution; Immune signatures	https://hgserver1.amc.nl/cgi-bin/r2/main.cgi
ALL (T) - Meijerink	Acute lymphoblastic leukemia	124	KIT expression distribution; Immune signatures	https://hgserver1.amc.nl/cgi-bin/r2/main.cgi
ALL (T) - Pieters	Acute lymphoblastic leukemia	92	KIT expression distribution; Immune signatures	https://hgserver1.amc.nl/cgi-bin/r2/main.cgi
ALL (T) Pediatric (combat) - Boer	Acute lymphoblastic leukemia	654	KIT expression distribution; Immune signatures	https://hgserver1.amc.nl/cgi-bin/r2/main.cgi
ALL (TARGET) - Roberts	Acute lymphoblastic leukemia	283	KIT expression distribution; Immune signatures	https://hgserver1.amc.nl/cgi-bin/r2/main.cgi
Leukemia ALL (Pediatric) - MILE	Acute lymphoblastic leukemia	2004	KIT expression distribution; Immune signatures	https://hgserver1.amc.nl/cgi-bin/r2/main.cgi
Leukemia ALL (T) - MILE	Acute lymphoblastic leukemia	2004	KIT expression distribution; Immune signatures	https://hgserver1.amc.nl/cgi-bin/r2/main.cgi
Leukemia ALL - MILE	Acute lymphoblastic leukemia	2004	KIT expression distribution; Immune signatures	https://hgserver1.amc.nl/cgi-bin/r2/main.cgi
AML (MLD) - Haferlach	Acute myeloid leukemia	96	KIT expression distribution; Immune signatures	https://hgserver1.amc.nl/cgi-bin/r2/main.cgi
AML - Bohlander	Acute myeloid leukemia	140	KIT expression distribution; Immune signatures	https://hgserver1.amc.nl/cgi-bin/r2/main.cgi
AML - Delwel	Acute myeloid leukemia	460	KIT expression distribution; Immune signatures	https://hgserver1.amc.nl/cgi-bin/r2/main.cgi
AML - denBoer	Acute myeloid leukemia	237	KIT expression distribution; Immune signatures	https://hgserver1.amc.nl/cgi-bin/r2/main.cgi
AML - Ley	Acute myeloid leukemia	179	KIT expression distribution; Immune signatures	https://hgserver1.amc.nl/cgi-bin/r2/main.cgi
AML - Metzeler	Acute myeloid leukemia	79	KIT expression distribution; Immune signatures	https://hgserver1.amc.nl/cgi-bin/r2/main.cgi
AML - Scholl	Acute myeloid leukemia	260	KIT expression distribution; Immune signatures	https://hgserver1.amc.nl/cgi-bin/r2/main.cgi
AML CEBPA - Dohner	Acute myeloid leukemia	154	KIT expression distribution; Immune signatures	https://hgserver1.amc.nl/cgi-bin/r2/main.cgi
AML CEBPA - Verhaak	Acute myeloid leukemia	525	KIT expression distribution; Immune signatures	https://hgserver1.amc.nl/cgi-bin/r2/main.cgi
AML NK - Haferlach	Acute myeloid leukemia	251	KIT expression distribution; Immune signatures	https://hgserver1.amc.nl/cgi-bin/r2/main.cgi
Leukemia AML - MILE	Acute myeloid leukemia	2004	KIT expression distribution; Immune signatures	https://hgserver1.amc.nl/cgi-bin/r2/main.cgi
Breast (Anthracycline) - Sotiriou	Breast cancer	120	KIT expression distribution; Immune signatures	https://hgserver1.amc.nl/cgi-bin/r2/main.cgi
Breast (Drug) - Prat	Breast cancer	156	KIT expression distribution; Immune signatures	https://hgserver1.amc.nl/cgi-bin/r2/main.cgi
Breast (HER2) - Concha	Breast cancer	66	KIT expression distribution; Immune signatures	https://hgserver1.amc.nl/cgi-bin/r2/main.cgi
Breast (MDC) - Bertucci	Breast cancer	266	KIT expression distribution; Immune signatures	https://hgserver1.amc.nl/cgi-bin/r2/main.cgi
Breast (mutation status) - Meijers-Heijboer	Breast cancer	155	KIT expression distribution; Immune signatures	https://hgserver1.amc.nl/cgi-bin/r2/main.cgi
Breast (Relapse) - Smid	Breast cancer	210	KIT expression distribution; Immune signatures	https://hgserver1.amc.nl/cgi-bin/r2/main.cgi
Breast (TNBC) - Brown	Breast cancer	198	KIT expression distribution; Immune signatures	https://hgserver1.amc.nl/cgi-bin/r2/main.cgi
Breast - Black	Breast cancer	107	KIT expression distribution; Immune signatures	https://hgserver1.amc.nl/cgi-bin/r2/main.cgi
Breast - Bos	Breast cancer	204	KIT expression distribution; Immune signatures	https://hgserver1.amc.nl/cgi-bin/r2/main.cgi
Breast - EXPO	Breast cancer	351	KIT expression distribution; Immune signatures	https://hgserver1.amc.nl/cgi-bin/r2/main.cgi
Breast - Iglehart	Breast cancer	123	KIT expression distribution; Immune signatures	https://hgserver1.amc.nl/cgi-bin/r2/main.cgi
Breast - Loi	Breast cancer	77	KIT expression distribution; Immune signatures	https://hgserver1.amc.nl/cgi-bin/r2/main.cgi
Breast - Yu	Breast cancer	683	KIT expression distribution; Immune signatures	https://hgserver1.amc.nl/cgi-bin/r2/main.cgi
Cervix - EXPO	Cervical and endometrial cancer	36	KIT expression distribution; Immune signatures	https://hgserver1.amc.nl/cgi-bin/r2/main.cgi
Cervix Cancer - Ahlquist	Cervical and endometrial cancer	20	KIT expression distribution; Immune signatures	https://hgserver1.amc.nl/cgi-bin/r2/main.cgi
Endometrium - EXPO	Cervical and endometrial cancer	209	KIT expression distribution; Immune signatures	https://hgserver1.amc.nl/cgi-bin/r2/main.cgi
CLL - Kueppers	Chronic lymphoblastic leukemia	46	KIT expression distribution; Immune signatures	https://hgserver1.amc.nl/cgi-bin/r2/main.cgi
CLL - Regev	Chronic lymphoblastic leukemia	188	KIT expression distribution; Immune signatures	https://hgserver1.amc.nl/cgi-bin/r2/main.cgi
CLL - Wiestner	Chronic lymphoblastic leukemia	62	KIT expression distribution; Immune signatures	https://hgserver1.amc.nl/cgi-bin/r2/main.cgi
Leukemia CLL - MILE	Chronic lymphoblastic leukemia	2004	KIT expression distribution; Immune signatures	https://hgserver1.amc.nl/cgi-bin/r2/main.cgi
CNS PNET - Kool	CNS PNET tumor	182	KIT expression distribution; Immune signatures	https://hgserver1.amc.nl/cgi-bin/r2/main.cgi
Colon (KRAS mut) - Hase	Colorectal cancer	59	KIT expression distribution; Immune signatures	https://hgserver1.amc.nl/cgi-bin/r2/main.cgi
Colon (Metastatic) - Clary	Colorectal cancer	133	KIT expression distribution; Immune signatures	https://hgserver1.amc.nl/cgi-bin/r2/main.cgi
Colon (Molecular subtypes) - Martineau	Colorectal cancer	124	KIT expression distribution; Immune signatures	https://hgserver1.amc.nl/cgi-bin/r2/main.cgi
Colon - EXPO	Colorectal cancer	315	KIT expression distribution; Immune signatures	https://hgserver1.amc.nl/cgi-bin/r2/main.cgi
Colon - Olschwang	Colorectal cancer	130	KIT expression distribution; Immune signatures	https://hgserver1.amc.nl/cgi-bin/r2/main.cgi
Colon - SieberSmith	Colorectal cancer	355	KIT expression distribution; Immune signatures	https://hgserver1.amc.nl/cgi-bin/r2/main.cgi
Colon - Skrzypczak	Colorectal cancer	111	KIT expression distribution; Immune signatures	https://hgserver1.amc.nl/cgi-bin/r2/main.cgi
Colon - Sugihara	Colorectal cancer	148	KIT expression distribution; Immune signatures	https://hgserver1.amc.nl/cgi-bin/r2/main.cgi
Colon - Watanabe	Colorectal cancer	84	KIT expression distribution; Immune signatures	https://hgserver1.amc.nl/cgi-bin/r2/main.cgi
Colon MS - Jorissen	Colorectal cancer	155	KIT expression distribution; Immune signatures	https://hgserver1.amc.nl/cgi-bin/r2/main.cgi
Rectal Drug - Hashimoto	Colorectal cancer	46	KIT expression distribution; Immune signatures	https://hgserver1.amc.nl/cgi-bin/r2/main.cgi
Ulcerative Colitis Colon Cancer - Watanabe	Colorectal cancer	68	KIT expression distribution; Immune signatures	https://hgserver1.amc.nl/cgi-bin/r2/main.cgi
Ependymoma - Foreman	Ependymoma	136	KIT expression distribution; Immune signatures	https://hgserver1.amc.nl/cgi-bin/r2/main.cgi
Ependymoma - Gilbertson	Ependymoma	83	KIT expression distribution; Immune signatures	https://hgserver1.amc.nl/cgi-bin/r2/main.cgi
Ependymoma - Hoffman	Ependymoma	65	KIT expression distribution; Immune signatures	https://hgserver1.amc.nl/cgi-bin/r2/main.cgi
Ependymoma - Pfister	Ependymoma	209	KIT expression distribution; Immune signatures	https://hgserver1.amc.nl/cgi-bin/r2/main.cgi
Ewing Sarcoma - Delattre	Ewing Sarcoma	117	KIT expression distribution; Immune signatures	https://hgserver1.amc.nl/cgi-bin/r2/main.cgi
Ewing Sarcoma - Francesconi	Ewing Sarcoma	37	KIT expression distribution; Immune signatures	https://hgserver1.amc.nl/cgi-bin/r2/main.cgi
Ewing Sarcoma - Savola	Ewing Sarcoma	99	KIT expression distribution; Immune signatures	https://hgserver1.amc.nl/cgi-bin/r2/main.cgi
Brain glioma - Sun	Glioblastoma	153	KIT expression distribution; Immune signatures	https://hgserver1.amc.nl/cgi-bin/r2/main.cgi
Glioblastoma - Hegi	Glioblastoma	84	KIT expression distribution; Immune signatures	https://hgserver1.amc.nl/cgi-bin/r2/main.cgi
Glioblastoma - Loeffler	Glioblastoma	70	KIT expression distribution; Immune signatures	https://hgserver1.amc.nl/cgi-bin/r2/main.cgi
Glioblastoma - Pfister	Glioblastoma	46	KIT expression distribution; Immune signatures	https://hgserver1.amc.nl/cgi-bin/r2/main.cgi
Glioma - French	Glioblastoma	284	KIT expression distribution; Immune signatures	https://hgserver1.amc.nl/cgi-bin/r2/main.cgi
Glioma - Kawaguchi	Glioblastoma	50	KIT expression distribution; Immune signatures	https://hgserver1.amc.nl/cgi-bin/r2/main.cgi
Glioma - Sun	Glioblastoma	153	KIT expression distribution; Immune signatures	https://hgserver1.amc.nl/cgi-bin/r2/main.cgi
Glioma pediatric - Paugh	Glioblastoma	53	KIT expression distribution; Immune signatures	https://hgserver1.amc.nl/cgi-bin/r2/main.cgi
Pilocytic Astrocytomas - Gutman	Glioblastoma	41	KIT expression distribution; Immune signatures	https://hgserver1.amc.nl/cgi-bin/r2/main.cgi
Kidney - EXPO	Renal cancer	261	KIT expression distribution; Immune signatures	https://hgserver1.amc.nl/cgi-bin/r2/main.cgi
Renal - Kort	Renal cancer	50	KIT expression distribution; Immune signatures	https://hgserver1.amc.nl/cgi-bin/r2/main.cgi
Renal cell carcinoma - Dykema	Renal cancer	47	KIT expression distribution; Immune signatures	https://hgserver1.amc.nl/cgi-bin/r2/main.cgi
Wilms (TARGET) - OCG	Renal cancer	125	KIT expression distribution; Immune signatures	https://hgserver1.amc.nl/cgi-bin/r2/main.cgi
HCC - Wu	Liver cancer	95	KIT expression distribution; Immune signatures	https://hgserver1.amc.nl/cgi-bin/r2/main.cgi
Hepatoblastoma - López_Terrada	Liver cancer	55	KIT expression distribution; Immune signatures	https://hgserver1.amc.nl/cgi-bin/r2/main.cgi
Hepatocellular Carcinoma - Llovet	Liver cancer	91	KIT expression distribution; Immune signatures	https://hgserver1.amc.nl/cgi-bin/r2/main.cgi
Liver HCC - Wurmbach	Liver cancer	35	KIT expression distribution; Immune signatures	https://hgserver1.amc.nl/cgi-bin/r2/main.cgi
Lung (NSCLC) - Chuang	Lung cancer	120	KIT expression distribution; Immune signatures	https://hgserver1.amc.nl/cgi-bin/r2/main.cgi
Lung (NSCLC) - Muley	Lung cancer	100	KIT expression distribution; Immune signatures	https://hgserver1.amc.nl/cgi-bin/r2/main.cgi
Lung - Bild	Lung cancer	114	KIT expression distribution; Immune signatures	https://hgserver1.amc.nl/cgi-bin/r2/main.cgi
Lung - EXPO	Lung cancer	121	KIT expression distribution; Immune signatures	https://hgserver1.amc.nl/cgi-bin/r2/main.cgi
Lung - Farez_Vidal	Lung cancer	46	KIT expression distribution; Immune signatures	https://hgserver1.amc.nl/cgi-bin/r2/main.cgi
Lung - Peitsch	Lung cancer	150	KIT expression distribution; Immune signatures	https://hgserver1.amc.nl/cgi-bin/r2/main.cgi
non-small cell lung carcinoma - Hou	Lung cancer	91	KIT expression distribution; Immune signatures	https://hgserver1.amc.nl/cgi-bin/r2/main.cgi
B cell Lymphoma (BAGS-subtypes) - Boedker	Lymphoma	122	KIT expression distribution; Immune signatures	https://hgserver1.amc.nl/cgi-bin/r2/main.cgi
B cell Lymphoma (DLBCL) - Jardin	Lymphoma	223	KIT expression distribution; Immune signatures	https://hgserver1.amc.nl/cgi-bin/r2/main.cgi
B cell Lymphoma (High Grade) - Chan	Lymphoma	61	KIT expression distribution; Immune signatures	https://hgserver1.amc.nl/cgi-bin/r2/main.cgi
B cell Lymphoma - Shipp	Lymphoma	137	KIT expression distribution; Immune signatures	https://hgserver1.amc.nl/cgi-bin/r2/main.cgi
B cell Lymphoma - Xiao	Lymphoma	420	KIT expression distribution; Immune signatures	https://hgserver1.amc.nl/cgi-bin/r2/main.cgi
B cell non-Hodgkin Lymphoma (B-NHL) - Green	Lymphoma	290	KIT expression distribution; Immune signatures	https://hgserver1.amc.nl/cgi-bin/r2/main.cgi
Lymphoma (NK T-cell) - Tsai	Lymphoma	44	KIT expression distribution; Immune signatures	https://hgserver1.amc.nl/cgi-bin/r2/main.cgi
Lymphoma (T-cell Peripheral) - Rosenwald	Lymphoma	193	KIT expression distribution; Immune signatures	https://hgserver1.amc.nl/cgi-bin/r2/main.cgi
Lymphoma DLBCL Rituximab - Roche	Lymphoma	498	KIT expression distribution; Immune signatures	https://hgserver1.amc.nl/cgi-bin/r2/main.cgi
Lymphoma follicular - McKeithan	Lymphoma	42	KIT expression distribution; Immune signatures	https://hgserver1.amc.nl/cgi-bin/r2/main.cgi
Lymphoma Hodgin - Farinha	Lymphoma	130	KIT expression distribution; Immune signatures	https://hgserver1.amc.nl/cgi-bin/r2/main.cgi
Lymphoma Hodgin - Kuppers	Lymphoma	67	KIT expression distribution; Immune signatures	https://hgserver1.amc.nl/cgi-bin/r2/main.cgi
Lymphomas Follicular - PRIMABIO	Lymphoma	149	KIT expression distribution; Immune signatures	https://hgserver1.amc.nl/cgi-bin/r2/main.cgi
Mantle cell lymphoma - Staudt	Lymphoma	122	KIT expression distribution; Immune signatures	https://hgserver1.amc.nl/cgi-bin/r2/main.cgi
Medulloblastoma - Gilbertson	Medulloblastoma	76	KIT expression distribution; Immune signatures	https://hgserver1.amc.nl/cgi-bin/r2/main.cgi
Medulloblastoma - Pfister	Medulloblastoma	223	KIT expression distribution; Immune signatures	https://hgserver1.amc.nl/cgi-bin/r2/main.cgi
Medulloblastoma Ependymoma - denBoer	Medulloblastoma	51	KIT expression distribution; Immune signatures	https://hgserver1.amc.nl/cgi-bin/r2/main.cgi
Medulloblastoma PLoS One - Kool	Medulloblastoma	62	KIT expression distribution; Immune signatures	https://hgserver1.amc.nl/cgi-bin/r2/main.cgi
Medulloblastoma public - Delattre	Medulloblastoma	57	KIT expression distribution; Immune signatures	https://hgserver1.amc.nl/cgi-bin/r2/main.cgi
Multiple Myeloma - Zweegman	Myeloma	180	KIT expression distribution; Immune signatures	https://hgserver1.amc.nl/cgi-bin/r2/main.cgi
Myeloma - Hanamura	Myeloma	542	KIT expression distribution; Immune signatures	https://hgserver1.amc.nl/cgi-bin/r2/main.cgi
Myeloma - Shaughnessy	Myeloma	78	KIT expression distribution; Immune signatures	https://hgserver1.amc.nl/cgi-bin/r2/main.cgi
Neuroblastic mixed - Delattre	Neuroblastoma	64	KIT expression distribution; Immune signatures	https://hgserver1.amc.nl/cgi-bin/r2/main.cgi
Neuroblastoma - Hiyama	Neuroblastoma	51	KIT expression distribution; Immune signatures	https://hgserver1.amc.nl/cgi-bin/r2/main.cgi
Neuroblastoma - Lastowska	Neuroblastoma	30	KIT expression distribution; Immune signatures	https://hgserver1.amc.nl/cgi-bin/r2/main.cgi
Neuroblastoma public - Versteeg	Neuroblastoma	88	KIT expression distribution; Immune signatures	https://hgserver1.amc.nl/cgi-bin/r2/main.cgi
Ovarian - Anglesio	Ovarian cancer	90	KIT expression distribution; Immune signatures	https://hgserver1.amc.nl/cgi-bin/r2/main.cgi
Ovarian - Birrer	Ovarian cancer	53	KIT expression distribution; Immune signatures	https://hgserver1.amc.nl/cgi-bin/r2/main.cgi
Ovarian - Bowtell	Ovarian cancer	285	KIT expression distribution; Immune signatures	https://hgserver1.amc.nl/cgi-bin/r2/main.cgi
Ovarian - Pamuła-Piłat	Ovarian cancer	101	KIT expression distribution; Immune signatures	https://hgserver1.amc.nl/cgi-bin/r2/main.cgi
Ovarian - Pamuła_Piłat	Ovarian cancer	101	KIT expression distribution; Immune signatures	https://hgserver1.amc.nl/cgi-bin/r2/main.cgi
Ovarian adenocarcinoma - Mechta_Grigoriou	Ovarian cancer	107	KIT expression distribution; Immune signatures	https://hgserver1.amc.nl/cgi-bin/r2/main.cgi
Ovary - EXPO	Ovarian cancer	256	KIT expression distribution; Immune signatures	https://hgserver1.amc.nl/cgi-bin/r2/main.cgi
pancreatic (PDA) - Sadanandam	Pancreatic cancer	47	KIT expression distribution; Immune signatures	https://hgserver1.amc.nl/cgi-bin/r2/main.cgi
pancreatic - Wang	Pancreatic cancer	35	KIT expression distribution; Immune signatures	https://hgserver1.amc.nl/cgi-bin/r2/main.cgi
Pancreatic - Wu	Pancreatic cancer	32	KIT expression distribution; Immune signatures	https://hgserver1.amc.nl/cgi-bin/r2/main.cgi
pancreatic ductal - Badea	Pancreatic cancer	39	KIT expression distribution; Immune signatures	https://hgserver1.amc.nl/cgi-bin/r2/main.cgi
Rhabdoid - Han	Rhabdoid tumor	54	KIT expression distribution; Immune signatures	https://hgserver1.amc.nl/cgi-bin/r2/main.cgi
Rhabdoid Pediatric ATRT - Foreman	Rhabdoid tumor	71	KIT expression distribution; Immune signatures	https://hgserver1.amc.nl/cgi-bin/r2/main.cgi
Rhabdomyosarcoma - Barr	Rhabdoid tumor	58	KIT expression distribution; Immune signatures	https://hgserver1.amc.nl/cgi-bin/r2/main.cgi
ATRT - Kool	Rhabdoid tumor	49	KIT expression distribution; Immune signatures	https://hgserver1.amc.nl/cgi-bin/r2/main.cgi
Cangelosi	Neuroblastoma	786	KIT association with clinical features	https://www.mdpi.com/2072-6694/12/9/2343
Neuroblastoma - Lebedev	Neuroblastoma	60	KIT correlation with signaling pathways	https://www.nature.com/articles/s41388-021-02018-7
DepMap CRISPR knockout screens public 21Q4	Cell lines	1054	NB cells dependencies; Drug sensitivity- gene dependency correlations	https://depmap.org/portal/download/all/
CCLE protein array data	NB cell lines	16	KIT protein mRNA correlation	https://depmap.org/portal/download/all/
PRISM drug screen tests	NB cell lines	11	Drug sensitivity- gene dependency correlations	https://depmap.org/portal/download/all/
