# Supplementary material for: Subtype of Neuroblastoma Cells with High KIT Expression Are Dependent on KIT and Its Knockdown Induces Compensatory Activation of Pro-Survival Signaling
Source: Int J Mol Sci. 2022 Jul 13;23(14):7724. doi: 10.3390/ijms23147724 (PMC9324519; doi:10.3390/ijms23147724)
Supplement: Supplementary file 1 [file ijms-23-07724-s001.zip › Table S2.xlsx]

## Sheet: R-values
Signature	ALL	AML	Rhabdoid	Lymphoma	Glioblastoma	Breast	Cervix & Endo	CLL	CNS PNET	Colorectal	Ependymoma	Ewing Sarcoma	Liver	Kidney	Lung	Medulloblastoma	Myeloma	Neuroblastoma	Ovarian	Pancreatic
Activated B cell	0.151193	0.0096342	0.0826531	0.17449	0.0416744	0.210636	0.10213	-0.077906	-0.168477	0.403338	0.0124176	-0.178664	0.162803	-0.299193	0.144929	0.0209325	0.0857685	0.0494071	0.0618914	0.640965
Activated CD4 T cell	0.162102	-0.141838	-0.238848	0.209384	-0.227474	0.217678	-0.08494	0.0689273	-0.0707446	0.107119	-0.0314724	-0.0287937	0.137401	-0.352851	0.0124061	-0.0108962	0.0287382	0.0939396	-0.13458	0.379943
Activated CD8 T cell	-0.0267317	-0.0302632	-0.0499714	0.236701	-0.115512	0.2035	0.0480023	0.102516	-0.00985579	0.139851	0.029151	-0.175512	0.0613617	-0.37618	0.0259208	0.0620618	-0.0318037	-0.000690169	-0.0493059	0.602366
Central memory CD4 T cell	-0.185239	-0.444307	-0.0955296	0.337495	-0.347955	0.358916	0.11913	0.114326	-0.0361724	0.333486	0.0669383	-0.224459	0.164004	-0.438464	-0.0482406	0.0547902	-0.162565	-0.070617	0.0407854	0.701044
Central memory CD8 T cell	0.382739	-0.361907	-0.114134	0.305122	-0.258725	0.241311	0.134276	0.290051	-0.0567262	0.324316	0.0452934	-0.132969	0.207497	-0.41708	-0.202858	0.0618078	-0.00297493	-0.00331501	0.149249	0.767415
Effector memeory CD4 T cell	0.255085	0.138535	0.0106528	0.35238	0.0845922	0.355604	0.0543738	0.109518	0.0901672	0.398967	0.262237	-0.0695625	0.476707	-0.478523	0.0749705	0.130894	0.0993164	0.0698888	0.0112758	0.766479
Effector memeory CD8 T cell	0.265015	-0.145823	0.0924213	0.261817	-0.192604	0.253092	0.0936862	0.117353	-0.117377	0.279504	0.0520877	-0.151107	0.0635108	-0.323728	0.044026	0.110495	0.0433199	0.0114607	-0.0310203	0.812784
Gamma delta T cell	0.292051	-0.194884	-0.0501728	0.291067	-0.285291	0.347665	0.145274	0.187641	-0.0746037	0.389564	0.0505589	-0.0329662	0.375241	-0.405496	0.0886656	0.119527	-0.00875218	0.0979906	0.0787087	0.603425
Immature B cell	0.0287447	-0.230734	0.183567	0.0227519	-0.0171855	0.140937	0.106852	-0.119423	-0.187043	0.191286	0.0936809	-0.118632	0.20573	-0.189023	0.0487073	0.107657	0.113429	0.0235001	-0.0126121	0.615676
Memory B cell	0.366965	0.269052	-0.155038	-0.127207	-0.046522	0.0608673	0.118332	0.395332	-0.0932664	-0.0330252	-0.0629363	-0.273046	0.212154	-0.296752	-0.189509	-0.0814555	-0.0505971	0.0302115	0.0198374	0.480276
Regulatory T cell	0.251733	-0.191738	0.0253257	0.27953	-0.216637	0.19258	0.154773	0.318049	-0.0343341	0.264148	-0.0132921	-0.0770938	0.314337	-0.3653	0.0209952	0.189316	0.0136611	0.0636056	0.0465849	0.755137
T follicular helper cell	0.372341	-0.281303	0.248321	0.314486	-0.038898	0.254194	0.160622	0.328669	0.0100324	0.185056	0.120737	-0.0998568	0.284313	-0.42726	0.0556775	0.290608	0.048453	-0.138437	0.101882	0.784354
Type 1 T helper cell	0.352776	-0.207095	0.130351	0.293901	-0.130123	0.245128	0.216289	0.371085	-0.0399138	0.252822	0.0163103	-0.240886	0.00226338	-0.413281	-0.0319895	0.0304326	-0.0302647	0.000176075	0.0811962	0.771759
Type 17 T helper cell	0.478228	-0.113654	0.178238	0.079179	0.122195	0.128443	0.00219419	0.398948	-0.0146658	0.056602	0.0701736	-0.309484	0.139551	-0.284826	-0.0668116	0.118866	0.007186	-0.128171	0.161863	0.289917
Type 2 T helper cell	0.428437	0.146951	-0.0203702	0.459753	0.00344794	0.509306	0.31866	0.325147	0.186964	0.304603	0.0991383	-0.0581867	0.474521	0.0869394	0.37235	0.205268	-0.0949606	-0.0279636	0.23318	0.66387
Activated dendritic cell	0.219405	-0.390481	-0.0424249	0.171202	-0.212471	0.132787	-0.135846	0.329138	-0.192638	0.305144	-0.0273622	-0.204384	-0.0534065	-0.340632	-0.146685	-0.0114516	0.109381	0.0212385	-0.140893	0.659198
CD56bright natural killer cell	0.402875	-0.0839823	0.20462	0.340091	-0.0499106	0.343049	-0.0241521	0.299353	0.104195	0.296809	0.316536	0.0677915	0.172531	-0.188463	-0.330377	0.0400385	0.0786407	0.0839471	0.104749	0.507695
CD56dim natural killer cell	0.359259	-0.404548	-0.0247429	-0.0241551	-0.0970785	0.0523411	0.0121385	0.280592	-0.137258	0.190112	-0.0548733	-0.284423	-0.224685	-0.257529	-0.137461	-0.0162707	-0.0111571	-0.0459876	0.103967	0.441893
Eosinophil	0.383331	-0.167122	0.112352	0.00572944	0.156064	0.105409	0.194607	0.110987	0.00546636	0.270373	0.16853	-0.281931	0.256226	-0.0403737	0.214321	-0.0501149	-0.000821108	0.0865125	0.178853	0.615973
Immature dendritic cell	0.16053	0.0641435	0.160615	0.272809	-0.0544956	0.382869	-0.122487	0.269686	-0.160203	0.364069	0.0598327	-0.0250225	0.153617	-0.00850663	-0.048916	0.100332	0.081261	-0.20758	0.00258445	0.366003
Macrophage	0.386847	-0.407415	0.170282	0.265079	-0.102086	0.188041	0.171009	0.273834	-0.0385025	0.208191	0.16733	-0.173153	0.164056	-0.395682	0.0885158	0.246027	0.0401976	-0.0181564	0.215271	0.745612
Mast cell	0.207887	-0.221729	0.0791158	0.456483	-0.103029	0.365014	0.310854	0.320849	-0.111792	0.36238	0.062746	-0.219334	0.437867	-0.297972	0.170451	-0.0206377	-0.0987085	0.0994122	0.237525	0.813555
MDSC	-0.0532539	-0.380237	-0.00180004	0.191653	-0.239584	0.123819	0.0856922	0.15774	-0.121324	0.298578	0.0481007	-0.136533	0.112361	-0.424986	-0.00681505	0.141028	0.0688305	0.0485687	0.0189384	0.765621
Monocyte	0.13522	-0.429456	0.248907	0.205985	-0.0755699	0.243358	0.0570037	0.0941891	-0.106915	0.190808	0.0966147	0.0103051	0.0962364	-0.122356	0.118301	0.0585213	0.127829	-0.148658	0.0810375	0.720535
Natural killer cell	0.417774	-0.242285	0.23144	0.354417	-0.191034	0.226192	0.237738	0.344043	0.029203	0.31698	0.101481	-0.112433	-0.0117372	-0.443864	0.120759	0.269652	0.113269	-0.0603746	0.13629	0.800514
Natural killer T cell	0.397536	-0.28737	0.113609	0.300924	-0.229076	0.195186	-0.0128921	0.317645	-0.155375	0.124422	0.0853983	-0.136595	0.061709	-0.468293	-0.158968	0.111874	-0.0247517	0.0126229	0.0783938	0.769457
Neutrophil	0.306598	-0.338287	0.00661344	0.0626757	-0.0603393	-0.129301	0.0955036	0.266476	-0.173271	0.0478388	-0.121823	-0.303511	-0.205385	-0.302846	0.122399	-0.0410646	-0.0275377	0.232036	0.18758	0.415761
Plasmacytoid dendritic cell	0.175957	-0.245167	0.0563991	0.35869	-0.183952	0.365166	0.226844	0.233458	-0.0241785	0.399239	0.051615	-0.128192	0.18487	-0.296505	-0.0282923	0.0233274	-0.0383305	-0.0400266	0.0811242	0.771263
Significant	17	11	0	16	3	10	2	16	0	17	2	5	7	22	2	2	0	0	0	28

## Sheet: p-values
Signature	ALL	AML	Rhabdoid	Lymphoma	Glioblastoma	Breast	Cervix & Endo	CLL	CNS PNET	Colorectal	Ependymoma	Ewing Sarcoma	Liver	Kidney	Lung	Medulloblastoma	Myeloma	Neuroblastoma	Ovarian	Pancreatic
Activated B cell	4.3945e-13	0.604223	0.268651	1.65195e-18	0.20614	1.70675e-28	0.0971083	0.0361	0.0229965	1.35267e-68	0.783296	0.00436192	0.00723946	1.50304e-11	0.00018282	0.651152	0.016717	0.452912	0.0533679	3.44741e-19
Activated CD4 T cell	7.7147e-15	1.72318e-14	0.00120329	4.06811e-26	2.75686e-12	2.30804e-30	0.167994	0.06379	0.342615	8.10145e-06	0.485677	0.64852	0.023686	9.38738e-16	0.750021	0.813937	0.423444	0.152896	2.48591e-05	1.17346e-06
Activated CD8 T cell	0.202868	0.103408	0.504098	4.10613e-33	0.000440654	1.14412e-26	0.436466	0.00576378	0.894946	5.28364e-09	0.518441	0.00511608	0.314213	7.5029e-18	0.505554	0.179679	0.375679	0.99164	0.123917	1.40687e-16
Central memory CD4 T cell	5.59358e-19	1.89932e-140	0.200811	1.62029e-67	1.23984e-27	5.19219e-83	0.0527414	0.00206314	0.627826	3.72124e-46	0.137766	0.000319948	0.00681588	2.40463e-24	0.215132	0.236301	5.17865e-06	0.283063	0.203224	4.38722e-24
Central memory CD8 T cell	3.95114e-80	2.28911e-90	0.126048	6.54061e-55	1.44364e-15	3.97909e-37	0.0288578	1.6822e-15	0.446885	1.3116e-43	0.315552	0.0345213	0.000587046	5.8322e-22	1.40662e-07	0.18147	0.933975	0.95986	2.86091e-06	3.81336e-31
Effector memeory CD4 T cell	4.61545e-35	6.9195e-14	0.88682	7.59352e-74	0.0101782	2.04576e-81	0.377988	0.00317143	0.226084	5.03621e-67	3.38806e-09	0.270324	8.79777e-17	2.7034e-29	0.0538538	0.00452036	0.00556101	0.288069	0.725103	4.97533e-31
Effector memeory CD8 T cell	8.29226e-38	3.08126e-15	0.215925	2.19602e-40	3.7317e-09	8.69565e-41	0.1282	0.0015608	0.114554	2.22335e-32	0.248343	0.0161533	0.297533	2.27782e-13	0.257984	0.0166717	0.227459	0.861862	0.333245	1.70323e-37
Gamma delta T cell	6.76656e-46	3.44058e-26	0.502378	6.52496e-50	9.99237e-19	1.145e-77	0.0179676	3.66818e-07	0.316866	1.00714e-63	0.262519	0.601737	1.73121e-10	9.7326e-21	0.0225193	0.00957247	0.807437	0.135881	0.0139581	1.2059e-16
Immature B cell	0.170888	2.59393e-36	0.0133765	0.255943	0.602255	1.80995e-13	0.0825339	0.00128493	0.0114609	1.05716e-15	0.0375853	0.0595278	0.000655336	2.63534e-05	0.210722	0.0196994	0.0015297	0.721217	0.69408	1.94274e-17
Memory B cell	2.48221e-73	3.17293e-49	0.0371606	1.809e-10	0.158108	0.00154248	0.0543585	1.6926e-28	0.210462	0.169998	0.162941	1.0551e-05	0.000437345	2.23279e-11	9.04688e-07	0.0780263	0.158563	0.64639	0.53612	2.91496e-10
Regulatory T cell	3.66905e-34	2.17695e-25	0.73505	5.14745e-46	2.96602e-11	5.29004e-24	0.0116415	1.75795e-18	0.645418	5.62436e-29	0.768455	0.221708	1.25502e-07	7.49377e-17	0.589728	3.68596e-05	0.703612	0.333716	0.146075	1.13749e-29
T follicular helper cell	1.3184e-75	7.87418e-54	0.000749997	2.12858e-58	0.238016	3.86256e-41	0.00880846	1.06786e-19	0.893074	8.89564e-15	0.00727891	0.113099	1.9621e-06	4.48427e-23	0.152445	1.40173e-10	0.176983	0.0346901	0.00144522	2.46041e-33
Type 1 T helper cell	1.55671e-67	1.97205e-29	0.0802877	6.74639e-51	7.41337e-05	2.7229e-38	0.000390607	4.69097e-25	0.59267	1.31975e-26	0.717912	0.000108977	0.970415	1.48594e-21	0.411233	0.510889	0.39923	0.997867	0.0112034	1.09039e-31
Type 17 T helper cell	3.95388e-130	8.54189e-10	0.0163689	7.5194e-05	0.000199785	2.03187e-11	0.971641	4.89924e-29	0.844219	0.0186185	0.119691	5.1109e-07	0.0215651	1.46377e-10	0.0858532	0.00998108	0.841389	0.0507025	3.74992e-07	0.000265199
Type 2 T helper cell	4.67981e-102	1.8764e-15	0.785482	9.79205e-131	0.91673	1.95986e-178	1.14708e-07	2.73755e-19	0.0114964	2.00428e-38	0.0277315	0.356678	1.26856e-16	0.054951	3.36739e-23	7.41828e-06	0.00803879	0.671104	1.66092e-13	6.3726e-21
Activated dendritic cell	3.72373e-26	3.79644e-106	0.570667	7.24815e-18	7.15587e-11	4.13604e-12	0.0270204	9.41391e-20	0.00917746	1.46194e-38	0.544442	0.00107774	0.381169	1.00901e-14	0.000152174	0.80464	0.0022492	0.747086	1.00642e-05	1.47941e-20
CD56bright natural killer cell	2.27473e-89	6.00272e-06	0.00572535	1.34961e-68	0.129925	1.54414e-75	0.695527	1.86696e-16	0.161574	1.75643e-36	6.18888e-13	0.282739	0.00439275	2.78698e-05	2.53232e-18	0.386971	0.0282808	0.201687	0.00105431	1.81373e-11
CD56dim natural killer cell	3.80008e-70	1.63332e-114	0.740927	0.227771	0.00317046	0.00648207	0.844083	1.44887e-14	0.0646446	1.5881e-15	0.223906	4.28777e-06	0.000191879	7.8317e-09	0.000389729	0.725253	0.756021	0.484824	0.00114995	9.62719e-09
Eosinophil	2.15842e-80	1.36525e-19	0.132108	0.774844	1.92092e-06	3.92796e-08	0.00145515	0.00278579	0.941617	2.49478e-30	0.00017033	5.24055e-06	1.95464e-05	0.373488	2.56571e-08	0.278767	0.981757	0.1882	1.8776e-08	1.8567e-17
Immature dendritic cell	1.40591e-14	0.000551281	0.030778	7.89966e-44	0.0981859	3.95478e-95	0.0463686	1.56932e-13	0.0307466	2.67307e-55	0.184734	0.692032	0.0113343	0.851316	0.208772	0.0298168	0.0234092	0.00144104	0.935763	3.04183e-06
Macrophage	5.80147e-82	2.86996e-116	0.021917	2.16993e-41	0.00191115	6.099e-23	0.00525031	6.42093e-14	0.605827	2.2487e-18	0.00018978	0.00575496	0.00679789	9.70516e-20	0.0227491	6.77546e-08	0.26277	0.782795	1.0981e-11	1.38459e-28
Mast cell	1.36431e-23	1.34993e-33	0.289746	1.11412e-128	0.00173313	5.33932e-86	2.4052e-07	8.49109e-19	0.132973	9.09657e-55	0.164219	0.000440853	4.03012e-14	1.83275e-11	1.03551e-05	0.655747	0.0058594	0.130267	5.6906e-14	1.28418e-37
MDSC	0.0111418	2.62685e-100	0.980813	4.54954e-22	1.67317e-13	1.04372e-10	0.164246	2.01044e-05	0.102785	6.44167e-37	0.286462	0.0299222	0.0647478	8.01431e-23	0.861066	0.00220356	0.0549775	0.460626	0.554757	6.34392e-31
Monocyte	9.79508e-11	2.37482e-130	0.00072793	2.60082e-25	0.0217441	9.4981e-38	0.355321	0.0112245	0.150848	1.24808e-15	0.0319714	0.870435	0.11397	0.00680619	0.00229787	0.205849	0.000351005	0.0232322	0.0113636	6.04551e-26
Natural killer cell	1.24916e-96	5.68202e-40	0.00171963	9.71651e-75	5.01464e-09	1.03432e-32	9.30713e-05	1.51588e-21	0.695546	1.23888e-41	0.0242381	0.0742336	0.847482	5.64258e-25	0.00185464	2.94949e-09	0.00155366	0.358902	1.95357e-05	1.28462e-35
Natural killer T cell	7.40484e-87	3.36791e-56	0.12781	2.17741e-53	1.92029e-12	1.26394e-24	0.834538	1.9516e-18	0.0362231	2.11934e-07	0.0581189	0.0298474	0.311477	5.73586e-28	3.98096e-05	0.0153536	0.49058	0.848015	0.0143463	2.12392e-31
Neutrophil	1.24819e-50	1.73775e-78	0.929591	0.00173524	0.0670479	1.49006e-11	0.120929	3.10054e-13	0.0193269	0.0467761	0.00676618	8.64168e-07	0.000669524	8.25451e-12	0.00160401	0.37491	0.443075	0.000354674	3.58825e-09	8.2223e-08
Plasmacytoid dendritic cell	2.99867e-17	6.46474e-41	0.45078	1.23719e-76	1.84318e-08	4.48933e-86	0.000196127	2.03174e-10	0.745949	4.02938e-67	0.252668	0.0416163	0.00224564	2.32347e-11	0.467402	0.614326	0.285605	0.543229	0.0112759	1.2597e-31

## Sheet: p-value-adjusted
Signature	ALL	AML	Rhabdoid	Lymphoma	Glioblastoma	Breast	Cervix & Endo	CLL	CNS PNET	Colorectal	Ependymoma	Ewing Sarcoma	Liver	Kidney	Lung	Medulloblastoma	Myeloma	Neuroblastoma	Ovarian	Pancreatic
Activated B cell	5.54806e-14	0.0435904	0.446909	2.38352e-19	0.0832804	3.01668e-28	0.126926	0.00405123	0.130068	4.09859e-68	0.67811	0.00837053	0.00602153	2.67895e-12	0.000307748	0.60932	0.0487764	0.80652	0.0425539	5.73487e-19
Activated CD4 T cell	1.06252e-15	1.58219e-15	0.011343	6.84799e-27	4.64072e-12	4.35143e-30	0.177753	0.00690299	0.56995	9.81896e-07	0.511862	0.478658	0.016746	2.18798e-16	0.420845	0.675277	0.554055	0.540487	3.76615e-05	1.27636e-06
Activated CD8 T cell	0.0219532	0.00773645	0.678852	7.31858e-34	0.000296707	1.90327e-26	0.404095	0.00069857	0.937373	6.96062e-10	0.523625	0.00892523	0.177719	2.06671e-18	0.306366	0.263472	0.548073	1	0.0938674	1.89458e-16
Central memory CD4 T cell	8.47428e-20	3.83663e-140	0.378596	7.01352e-68	1.25224e-26	2.9367e-82	0.0805231	0.00028415	0.829656	1.61077e-46	0.25688	0.000877115	0.00602153	1.82151e-24	0.155203	0.30496	0.000135991	0.678882	0.139948	8.86219e-24
Central memory CD8 T cell	1.4965e-80	6.60571e-91	0.266859	2.202e-55	4.86026e-15	8.65606e-37	0.053435	4.24754e-16	0.702106	4.96768e-44	0.347681	0.0414039	0.000788922	2.52451e-22	5.32759e-07	0.263472	0.908377	1	6.19182e-06	1.34802e-30
Effector memeory CD4 T cell	8.74051e-36	6.07713e-15	0.964587	4.60167e-74	0.00541049	9.64237e-81	0.365169	0.000400393	0.426244	5.08657e-67	4.10633e-08	0.235797	8.96872e-16	8.1913e-29	0.0509928	0.0150011	0.0219811	0.678882	0.406864	1.56336e-30
Effector memeory CD8 T cell	1.67504e-38	2.96388e-16	0.381647	4.15872e-41	4.18779e-09	2.45913e-40	0.149926	0.000225201	0.32396	4.81196e-33	0.318173	0.0238448	0.177719	4.6012e-14	0.177657	0.0352076	0.398205	0.974938	0.219507	2.40837e-36
Gamma delta T cell	1.46448e-46	4.08822e-27	0.678852	1.64755e-50	5.04614e-18	4.62579e-77	0.0399241	6.17477e-08	0.56006	7.62906e-64	0.318173	0.461893	6.11984e-10	3.27664e-21	0.0229765	0.0257623	0.848132	0.540487	0.0120748	1.70515e-16
Immature B cell	0.0191774	3.74267e-37	0.0630478	0.0287225	0.225288	2.4374e-13	0.114619	0.000194668	0.108373	1.68589e-16	0.0911069	0.0634632	0.000788922	3.47177e-06	0.155203	0.0381348	0.0101997	0.960345	0.404435	2.89162e-17
Memory B cell	7.52111e-74	5.82665e-50	0.10509	2.38316e-11	0.066537	0.00161561	0.0805231	2.56429e-28	0.425134	0.0183962	0.265378	4.04946e-05	0.000687117	3.52006e-12	2.7412e-06	0.129468	0.320297	0.948941	0.336183	3.58413e-10
Regulatory T cell	6.53954e-35	2.44302e-26	0.873059	1.19975e-46	4.27954e-11	7.8738e-24	0.0287417	5.91335e-19	0.829656	1.06511e-29	0.67811	0.202599	3.54921e-07	1.89218e-17	0.34363	0.00017125	0.803341	0.724982	0.105382	2.92439e-29
T follicular helper cell	4.43862e-76	1.59059e-54	0.010605	8.06201e-59	0.0924602	1.2137e-40	0.0244655	5.39268e-20	0.937373	1.22517e-15	0.0294068	0.108518	4.62402e-06	2.71747e-23	0.128308	3.25622e-09	0.33197	0.245259	0.00168423	1.73951e-32
Type 1 T helper cell	3.9307e-68	2.48971e-30	0.206412	1.85832e-51	5.75962e-05	7.00033e-38	0.00173586	4.73788e-25	0.829656	2.35226e-27	0.669314	0.000348545	0.49006	5.62798e-22	0.270878	0.539452	0.551778	1	0.0107599	5.93736e-31
Type 17 T helper cell	1.19803e-129	7.18943e-11	0.0661303	9.49324e-06	0.000144131	2.39422e-11	0.771067	1.48447e-28	0.937373	0.00216977	0.241777	8.29169e-06	0.016049	2.11201e-11	0.0765103	0.0257623	0.849803	0.286773	9.46856e-07	0.000267851
Type 2 T helper cell	7.08991e-102	1.89517e-16	0.888537	2.96699e-130	0.330678	5.54248e-177	2.54881e-06	1.18497e-19	0.108373	5.52087e-39	0.0840265	0.285193	8.96872e-16	0.0064039	5.10159e-22	4.30817e-05	0.0263873	0.948941	1.25815e-12	1.20145e-20
Activated dendritic cell	6.26828e-27	1.53376e-106	0.733566	9.98267e-19	9.03429e-11	5.31669e-12	0.053435	5.39268e-20	0.108373	4.42968e-39	0.527891	0.00229798	0.207298	2.18378e-15	0.000288179	0.675277	0.0118128	0.960345	1.90591e-05	2.61486e-20
CD56bright natural killer cell	1.72311e-89	4.8502e-07	0.0323826	6.81554e-69	0.0570541	5.45854e-75	0.618184	5.14262e-17	0.351486	4.09384e-37	1.50018e-11	0.235903	0.00443668	3.51856e-06	1.91823e-17	0.428064	0.0675141	0.570371	0.00145181	2.33147e-11
CD56dim natural killer cell	1.04675e-70	8.24826e-115	0.873059	0.0265441	0.00177898	0.00654689	0.694649	3.37697e-15	0.228519	2.2914e-16	0.318173	2.51415e-05	0.000339146	1.07864e-09	0.000590439	0.647985	0.827213	0.80652	0.00145181	1.1344e-08
Eosinophil	9.34289e-81	1.45147e-20	0.266859	0.0838492	1.61678e-06	4.27242e-08	0.0053889	0.000366997	0.951033	5.03946e-31	0.00115007	2.51415e-05	3.94838e-05	0.0419136	1.29568e-07	0.34083	0.920748	0.570371	5.68912e-08	2.89162e-17
Immature dendritic cell	1.85213e-15	4.28303e-05	0.0967114	1.70971e-44	0.0450762	5.59206e-94	0.0792547	3.17002e-14	0.144919	1.61988e-55	0.279872	0.491856	0.00890371	0.0921246	0.155203	0.0532804	0.0614725	0.0203763	0.506315	3.18604e-06
Macrophage	2.92974e-82	1.93244e-116	0.0774767	4.38327e-42	0.00113545	8.62399e-23	0.016666	1.38967e-14	0.829656	3.78531e-19	0.00115007	0.00920315	0.00602153	2.94066e-20	0.0229765	5.24646e-07	0.431272	0.962498	5.54543e-11	3.26302e-28
Mast cell	2.17572e-24	1.8179e-34	0.455222	1.68788e-128	0.00109404	3.7749e-85	2.67218e-06	3.216e-19	0.341861	4.59377e-55	0.265378	0.0010575	1.89953e-13	3.08512e-12	2.61466e-05	0.60932	0.0219811	0.540487	8.62125e-13	2.40837e-36
MDSC	0.00129845	8.84374e-101	0.990621	6.89255e-23	4.22476e-13	1.18066e-10	0.177753	3.20612e-06	0.322972	1.62652e-37	0.330659	0.0382805	0.0435969	4.04722e-23	0.465898	0.00853146	0.120309	0.80652	0.336183	1.79406e-30
Monocyte	1.18716e-11	2.39856e-130	0.010605	4.14762e-26	0.0109808	2.23839e-37	0.358874	0.00130809	0.351486	1.89084e-16	0.0861097	0.596559	0.0732515	0.00082491	0.0026779	0.281286	0.0046087	0.219002	0.0107599	1.31513e-25
Natural killer cell	1.26165e-96	8.82898e-41	0.0121578	7.36025e-75	5.06478e-09	2.08933e-32	0.000689348	1.14828e-21	0.855219	4.17091e-42	0.0839329	0.0749759	0.443829	5.69901e-25	0.00234148	3.42584e-08	0.0101997	0.724982	3.28852e-05	1.21097e-34
Natural killer T cell	4.48733e-87	7.55909e-57	0.266859	6.59757e-54	3.87899e-12	1.98579e-24	0.694649	5.91335e-19	0.146341	2.67567e-08	0.128073	0.0382805	0.177719	8.68983e-28	8.61593e-05	0.0352076	0.585574	0.974938	0.0120748	8.58064e-31
Neutrophil	2.90925e-51	4.38781e-79	0.973661	0.000210311	0.0322468	1.83212e-11	0.149281	5.87165e-14	0.130068	0.00524932	0.0294068	8.29169e-06	0.000788922	1.5632e-12	0.00220915	0.428064	0.554055	0.0100302	1.35905e-08	9.30107e-08
Plasmacytoid dendritic cell	4.32665e-18	1.08823e-41	0.67095	1.24956e-76	1.69237e-08	3.7749e-85	0.00108948	3.62127e-11	0.878976	5.08657e-67	0.318173	0.0469774	0.00244257	3.52006e-12	0.295047	0.60932	0.441176	0.853474	0.0107599	5.93736e-31
Significant	17	11	0	16	3	10	2	16	0	17	2	5	7	22	2	2	0	0	0	28
