# Supplementary material for: Subtype of Neuroblastoma Cells with High KIT Expression Are Dependent on KIT and Its Knockdown Induces Compensatory Activation of Pro-Survival Signaling
Source: Int J Mol Sci. 2022 Jul 13;23(14):7724. doi: 10.3390/ijms23147724 (PMC9324519; doi:10.3390/ijms23147724)
Supplement: Supplementary file 1 [file ijms-23-07724-s001.zip › Table S3.xlsx]

## Sheet: Sheet1
	Pathway	R	p_val	p_adjusted
320	WNT_Pathway_NFAT_Pathway	-0.671271	4.36206e-09	1.24122e-06
131	Glucocorticoid_Receptor_Signaling_Pathway_Cell_Cycle_Arrest	0.62235	1.10483e-07	1.57189e-05
243	Notch_Signaling_Pathway_gamma_Secretase	-0.594232	5.57244e-07	5.28546e-05
235	NGF_Pathway_Actin_Polymerization_Neurite_Outgrowth_and_Differentiation	-0.570016	1.99461e-06	0.000139512
247	PAK_Pathway_Contractility_Stress_Fibres_and_Focal_Adhesion	-0.56591	2.45146e-06	0.000139512
112	Erythropoietin_Pathway_BCLXL_Gene_Expression_via_STAT5B	-0.562034	2.97085e-06	0.000140893
44	Akt_Signaling_Pathway_Protein_Synthesis	-0.540925	8.1179e-06	0.000329993
231	Mitochondrial_Apoptosis_Pathway_DNA_Fragmentation	0.520735	1.99662e-05	0.000703081
236	NGF_Pathway_Apoptosis	-0.518228	2.22377e-05	0.000703081
305	Tumour_Infiltration_Pathway	-0.509028	3.27904e-05	0.000848229
330	cAMP_Pathway_Endothelial_Cell_Regulation	0.510267	3.11395e-05	0.000848229
37	Akt_Signaling_Pathway_JNK_mediated_apoptosis	-0.491666	6.62397e-05	0.00157071
115	Erythropoietin_Pathway_GPI_Hidrolysis_and_Ca2+_influx	-0.480143	0.000103486	0.00226514
276	RANK_Signaling_in_Osteoclasts_Pathway_Resorption	-0.473329	0.000133736	0.00271818
12	ATM_Pathway_G2-Mitosis_progression	-0.461846	0.00020358	0.00362055
13	ATM_Pathway_G2_M_Checkpoint_Arrest	-0.461846	0.00020358	0.00362055
175	IL-2_Pathway	-0.456091	0.000249917	0.00418317
110	Erythropoietin_Pathway	-0.454066	0.00026838	0.00424264
52	Akt_Signaling_Pathway_Tumor_Supression	-0.450861	0.000300168	0.00449541
24	Akt_Signaling_Pathway_Blocks_Apoptosis	-0.445603	0.00035983	0.00465764
53	Akt_Signaling_Pathway_p73_mediated_apoptosis	-0.447395	0.000338385	0.00465764
307	VEGF_Pathway	-0.445581	0.000360105	0.00465764
45	Akt_Signaling_Pathway_Proto-Oncogenic_and_RTK-signaling	-0.442714	0.000397025	0.00491189
27	Akt_Signaling_Pathway_Cell_Cycle_Progression	-0.437419	0.000474413	0.00494783
31	Akt_Signaling_Pathway_Enhancement_of_Breast_Epithelial	-0.43456	0.000521648	0.00494783
35	Akt_Signaling_Pathway_Increased_GLUT4_translocation	-0.43456	0.000521648	0.00494783
36	Akt_Signaling_Pathway_Induction_of_Chromatin_Condensation	-0.43456	0.000521648	0.00494783
41	Akt_Signaling_Pathway_NO_production	-0.43456	0.000521648	0.00494783
43	Akt_Signaling_Pathway_Promotes_Adipogenesis	-0.43456	0.000521648	0.00494783
151	HGF_Pathway_Regulation_of_Cytoskeleton_Cell_Polarity_and_Cell_Motility	-0.438166	0.000462715	0.00494783
29	Akt_Signaling_Pathway_ERK_mediated_apoptosis	-0.433328	0.0005433	0.00498697
198	ILK_Signaling_Pathway_Opsonization	0.431522	0.00057651	0.00512644
23	Akt_Signaling_Pathway_Apoptosis	-0.426821	0.000671741	0.00550427
98	EGF_Pathway_Gene_Expression_via_FOS_NFKB2_MYC_STAT1_ELK1_STAT3_JUN	-0.426578	0.000677032	0.00550427
288	STAT3_Pathway_Anti-Apoptosis	-0.427822	0.000650336	0.00550427
42	Akt_Signaling_Pathway_Neuroprotection	-0.425619	0.00069827	0.00551924
30	Akt_Signaling_Pathway_Elevation_of_Glucose_Import	-0.424441	0.000725207	0.00557723
39	Akt_Signaling_Pathway_NF-kB_pathway	-0.420269	0.000828256	0.00604308
124	GPCR_Pathway_Gene_Expression_via_JUN_NFKB2_ELK1_SRF_FOS_CREB3	-0.420717	0.000816586	0.00604308
138	Growth_Hormone_Signaling_Pathway_Gene_Expression_via_SRF_ELK1_STAT5B_CEBPD_STAT1_STAT3	-0.419263	0.000855002	0.00608227
32	Akt_Signaling_Pathway_Genetic_Stability	-0.418192	0.000884349	0.0061376
20	Akt_Signaling_Pathway_AR_mediated_apoptosis	-0.416534	0.000931548	0.00619116
217	JNK_Pathway_Insulin_Signaling	-0.416396	0.000935583	0.00619116
136	Growth_Hormone_Signaling_Pathway	-0.415367	0.000966134	0.00624803
273	RANK_Signaling_in_Osteoclasts_Pathway	-0.409824	0.00114668	0.00725086
21	Akt_Signaling_Pathway_Acetylation_of_proteins	-0.403994	0.00136886	0.00846758
274	RANK_Signaling_in_Osteoclasts_Pathway_Expression_of_Osteoclastic_Genes_via_JUN_NFAT5_NFKB2_MITF_FOS	-0.402593	0.00142772	0.00864379
40	Akt_Signaling_Pathway_NFAT_degradation	-0.397069	0.00168249	0.00997399
25	Akt_Signaling_Pathway_Blood_cell_differentiation	-0.387285	0.00223521	0.010284
60	BRCA1_Pathway_Growth_Promoting_Genes_hTert_S100A7	0.388747	0.00214349	0.010284
64	BRCA1_Pathway_Nucleotide_Excission_Repair	0.386652	0.00227603	0.010284
69	CD40_Pathway_Gene_Expression_COX2_and_Prostaglandins_via_NFKB2	-0.389405	0.00210332	0.010284
70	CD40_Pathway_Gene_Expression_Cell_Adhesion_Molecule_via_NFKB2	-0.389405	0.00210332	0.010284
71	CD40_Pathway_Gene_Expression_Cell_Survival_via_NFKB2	-0.389405	0.00210332	0.010284
72	CD40_Pathway_Gene_Expression_Co-Stimulatory_Molecules_via_NFKB2	-0.389405	0.00210332	0.010284
73	CD40_Pathway_Gene_Expression_Immunoglobulin_Class_Switch_via_NFKB2	-0.389405	0.00210332	0.010284
74	CD40_Pathway_Gene_Expression_Pro-Inflamatory_Cytokines_via_NFKB2	-0.389405	0.00210332	0.010284
75	CD40_Pathway_Gene_Expression_Procoagulant_Activity_via_NFKB2	-0.389405	0.00210332	0.010284
84	Cellular_Apoptosis_Pathway_Gene_Expression_FLIP_CIAP2_BFL1_BCL2_via_NFKB2	-0.389405	0.00210332	0.010284
227	MAPK_Signaling_Pathway_Gene_Expression_Cell_Proliferation_Cell_Survival_Tumorigenesis_Differentiation_Development_via_PXN_CREB3_RPS6KA5_RPS6KA6	0.387843	0.00219981	0.010284
278	Ras_Pathway_Apoptosis	-0.386638	0.00227691	0.010284
281	Ras_Pathway_Gene_Expression_Cell_Proliferation_Cell_Survival_Differentiation_Development_Cell_Cycle_Control_Cell_Motility_Tumorigenesis_via_ELK4_ATF2_MEF2D_STAT2_CREB3_CCNA1_MYC_ELK1_JUN_CDK4	0.394725	0.0018024	0.010284
352	mTOR_Pathway_Translation_Elongation	0.3914	0.00198555	0.010284
108	ErbB_Family_Pathway_Gene_Expression_via_JUN_FOS_ELK1	-0.384806	0.00239878	0.0105011
334	cAMP_Pathway_Glycolisis	-0.385302	0.00236524	0.0105011
314	VEGF_Pathway_Prostaglandin_Production	-0.38053	0.00270615	0.0116672
186	ILK_Signaling_Pathway_Cell_Adhesion	0.376628	0.00301669	0.0124406
199	ILK_Signaling_Pathway_Regulation_of_Junction_Assembly_at_Desmosomes	0.376628	0.00301669	0.0124406
202	ILK_Signaling_Pathway_Wound_Healing	0.376628	0.00301669	0.0124406
316	WNT_Pathway_Cell_Fate_Proliferation_Differentiation_Adhesion_and_Survival	0.372172	0.00340965	0.0138602
250	PAK_Pathway_Transciptional_Activation_and_Filopodia_Formation	-0.369403	0.00367611	0.0147329
114	Erythropoietin_Pathway_Cell_Survival	-0.36843	0.00377409	0.0149155
97	EGF_Pathway_EGFR_Endocytosis	0.365605	0.00407162	0.0156565
233	Mitochondrial_Apoptosis_Pathway_Gene_Expression_via_TP53	0.365984	0.00403055	0.0156565
116	Erythropoietin_Pathway_Gene_Expression_Neuroprotection_via_NFKB2	-0.364473	0.00419653	0.0157479
226	MAPK_Signaling_Pathway_Gene_Expression_Apoptosis_Inflammation_Tumorigenesis_via_MYC_HSF1_STAT2	-0.364387	0.00420609	0.0157479
300	TRAF_Pathway_Apoptosis	-0.360247	0.00469322	0.0173436
38	Akt_Signaling_Pathway_NF-kB_dependent_transciption	-0.358824	0.00487188	0.017773
8	ATM_Pathway_Cell_Cycle_Checkpoint_Control	-0.354689	0.00542513	0.0195408
67	CD40_Pathway	-0.353477	0.00559748	0.0199095
92	EGF_Pathway	-0.351474	0.0058928	0.0203227
102	ERK_Signaling_Pathway_Cell_Survival	0.351242	0.0059279	0.0203227
338	cAMP_Pathway_Oncogenesis	0.351768	0.00584859	0.0203227
34	Akt_Signaling_Pathway_Glycogen_Synthesis_and_Apoptosis	-0.349988	0.00612054	0.0206219
290	STAT3_Pathway_Growth_Arrest_and_Differentiation	-0.349735	0.00616013	0.0206219
308	VEGF_Pathway_Actin_Reorganization	-0.347002	0.00660184	0.0215926
309	VEGF_Pathway_Cell_Migration	-0.347002	0.00660184	0.0215926
177	IL-2_Pathway_Apoptosis	0.344071	0.00710631	0.0229784
18	ATM_Pathway_Synaptic_Vesicle_Transport	-0.339128	0.00803337	0.0253174
100	EGF_Pathway_Rab5_Regulation_Pathway	-0.337924	0.00827454	0.0253174
104	ERK_Signaling_Pathway_Gene_Expression_via_CAPN6_TP53_FOS_ATF1_MYC_ELK3_MYLK_ETS1_SRF_HIST1H3B_CREB3_STAT3_NFKB2_HMGN1_ESR2_ELK1_PAX6_JUN	0.338149	0.0082289	0.0253174
127	GSK3_Signaling_Pathway_Glycogen_Synthesis	-0.338637	0.00813084	0.0253174
289	STAT3_Pathway_G1_to_S_Cell_Cycle_Progression	0.339357	0.0079882	0.0253174
111	Erythropoietin_Pathway_Anti-Apoptosis	0.337159	0.00843094	0.0255215
234	NGF_Pathway	-0.336016	0.00866959	0.0259677
46	Akt_Signaling_Pathway_Regulation_of_Cyclic_Nucleotide	-0.332101	0.00953201	0.0282535
311	VEGF_Pathway_Focal_Adhesion_Turnover	-0.330386	0.00993261	0.0291374
122	FLT3_Signaling_Pathway_Translation	0.329267	0.0102018	0.0296217
56	BRCA1_Pathway_Cell_Cycle_Arrest_DNA_Repair_Genes_p21_WAF_CIP1_14-3-3_GADD45	0.328192	0.0104666	0.0300835
150	HGF_Pathway_PKC_Pathway	-0.325657	0.011114	0.0310048
232	Mitochondrial_Apoptosis_Pathway_Depolarization	0.325973	0.0110315	0.0310048
258	PTEN_Pathway_Apoptosis	0.326226	0.0109657	0.0310048
216	JNK_Pathway_Gene_Expression_Apoptosis_Inflammation_Tumorigenesis_Cell_Migration_via_SMAD4_STAT4_HSF1_TP53_MAP2_DCX_ATF2_NFATC3_SPIRE1_MAP1B_TCF15_ELK1_BCL2_JUN_PXN_NFATC2	-0.322882	0.0118623	0.0327711
149	HGF_Pathway_IP3_Pathway	-0.31997	0.012694	0.0347314
180	IL-2_Pathway_IL2_Gene_Expression_via_POLR1E_EGR1_HMGA1_ELF1_POU2F1_MYC	-0.319348	0.0128781	0.0348995
49	Akt_Signaling_Pathway_Survival_Genes	-0.317967	0.0132948	0.035689
279	Ras_Pathway_CDC42_Pathway	-0.313392	0.0147596	0.0392509
224	MAPK_Signaling_Pathway_Cell_Motility_Inflammation_Apoptosis_Osmoregulation	0.311698	0.0153359	0.0402201
229	Mitochondrial_Apoptosis_Pathway	-0.311494	0.0154067	0.0402201
128	GSK3_Signaling_Pathway_Protein_Synthesis	-0.309033	0.0162817	0.0421179
375	p53_Signaling_Pathway_Inhibition_of_IGF1R_mTOR_Pathways	0.307693	0.0167761	0.0430057
137	Growth_Hormone_Signaling_Pathway_Cell_Survival	-0.307229	0.0169502	0.043064
78	Caspase_Cascade_Pathway_Activated_Tissue_Trans-glutaminase	0.304849	0.0178676	0.0449932
99	EGF_Pathway_IP3_Signaling	0.302997	0.0186103	0.0464523
297	TNF_Signaling_Pathway_Apoptosis	-0.302512	0.0188092	0.0465405
28	Akt_Signaling_Pathway_Cell_Survival	-0.300414	0.0196903	0.0483006
329	cAMP_Pathway_Degradation_of_Cell_Cycle_Regulators	-0.299697	0.0199992	0.048639
301	TRAF_Pathway_Cell_Survival	-0.294375	0.0224246	0.0540755
66	Base_Excision_Repair_Pathway	-0.292022	0.023574	0.0558998
77	Caspase_Cascade_Pathway	0.29235	0.0234108	0.0558998
1	AHR_Pathway_C-myc_expression_via_RELA	-0.29064	0.0242717	0.0570786
94	EGF_Pathway_Cell_Motility	0.289435	0.0248945	0.0580634
157	HIF1Alpha_Pathway_p53_Hypoxia_Pathway	-0.286148	0.0266616	0.0616793
332	cAMP_Pathway_Gene_Expression_via_NFKB2_CREBBP_ELK1	-0.284198	0.0277592	0.0637007
154	HIF1Alpha_Pathway_HIF1a_Degradation	-0.280355	0.0300329	0.0683669
139	Growth_Hormone_Signaling_Pathway_Glucose_Uptake	-0.279675	0.030451	0.0687686
220	MAPK_Family_Pathway_Cytoskeleton	0.278905	0.0309309	0.069169
299	TRAF_Pathway	-0.278612	0.0311145	0.069169
103	ERK_Signaling_Pathway_EGFR_signaling	0.276898	0.0322097	0.0694338
196	ILK_Signaling_Pathway_MMP2_MMP9_Gene_Expression_Tissue_Invasion_via_FOS	-0.277005	0.0321405	0.0694338
200	ILK_Signaling_Pathway_Tissue_Morphogenesis	-0.277005	0.0321405	0.0694338
205	Interferon_Pathway	0.27732	0.0319374	0.0694338
165	IGF1R_Signaling_Pathway_Cell_Survival	0.276253	0.0326305	0.0698121
239	NGF_Pathway_Neuronal_Survival	-0.274639	0.0337026	0.0715676
269	PTEN_Pathway_Proliferation_CyclinA2_Geminin_AuroraA_PLK1	0.271071	0.0361767	0.0756917
271	PTEN_Pathway_Senescence_Ets2_p16	0.271071	0.0361767	0.0756917
210	JAK-STAT_Pathway_Akt_Pathway	-0.268397	0.0381285	0.0791932
33	Akt_Signaling_Pathway_Glucose_Uptake	-0.266712	0.0394024	0.0803227
168	IGF1R_Signaling_Pathway_Glycogen_Synthesis	0.266506	0.0395604	0.0803227
169	IGF1R_Signaling_Pathway_Protein_Synthesis	0.266279	0.0397353	0.0803227
284	Ras_Pathway_Receptor_Endocytosis	-0.265829	0.0400837	0.0803227
321	WNT_Pathway_PKC_Pathway	-0.266093	0.0398789	0.0803227
15	ATM_Pathway_Repair_and_Recombination	-0.261287	0.043745	0.0870464
105	ERK_Signaling_Pathway_Translation	0.258236	0.0463556	0.0916005
346	mTOR_Pathway_Inflammation_Stress_Resistance	-0.257803	0.0467361	0.0917156
81	Cellular_Apoptosis_Pathway_DNA_Fragmentation	0.25533	0.0489597	0.0938906
222	MAPK_Family_Pathway_Translation	-0.255426	0.0488715	0.0938906
323	cAMP_Pathway_Axonal_Growth	-0.255742	0.0485833	0.0938906
358	p38_Signaling_Pathway_Translation	0.255107	0.0491643	0.0938906
14	ATM_Pathway_NF-kB_Pathway	-0.253661	0.0505085	0.0958146
90	Circadian_Pathway	0.253275	0.0508724	0.0958658
155	HIF1Alpha_Pathway_NOS_Pathway	-0.252141	0.0519539	0.096624
156	HIF1Alpha_Pathway_VEGF_Pathway	-0.252141	0.0519539	0.096624
296	TNF_Signaling_Pathway	-0.250854	0.0532036	0.0983057
349	mTOR_Pathway_Microtubule_Organization	0.246354	0.0577669	0.106049
170	IL-10_Pathway	-0.245885	0.0582601	0.106269
57	BRCA1_Pathway_Chromatin_Remodeling	-0.245229	0.0589552	0.106852
113	Erythropoietin_Pathway_Cell_Cycle_Progression	-0.243986	0.0602917	0.108582
240	Notch_Signaling_Pathway	-0.243466	0.0608586	0.108914
158	Hedgehog_Signaling_in_Mammals_Pathway	0.241388	0.0631646	0.110948
275	RANK_Signaling_in_Osteoclasts_Pathway_Inhibition_of_Death	-0.241474	0.0630677	0.110948
339	cAMP_Pathway_Protein_Retention	0.241919	0.0625691	0.110948
135	Glucocorticoid_Receptor_Signaling_Pathway_Inflammatory_Cytokines	0.240948	0.0636616	0.111105
142	HGF_Pathway	-0.240619	0.0640353	0.111105
50	Akt_Signaling_Pathway_Synaptic_Transmission	-0.239682	0.0651105	0.112286
143	HGF_Pathway_Anoikis	-0.238252	0.0667777	0.114467
190	ILK_Signaling_Pathway_Cytoskeletal_Adhesion_Complexes	0.236275	0.0691397	0.116392
260	PTEN_Pathway_Cell_Cycle	-0.235948	0.0695367	0.116392
265	PTEN_Pathway_Growth	-0.235948	0.0695367	0.116392
353	mTOR_Pathway_VEGF_Pathway	-0.236637	0.0687027	0.116392
4	AHR_Pathway_PS2_Gene_expression_via_ESR1	-0.233319	0.0727947	0.119985
148	HGF_Pathway_Gene_Expression_via_JUN_STAT3_FOS_ELK1_ETS2	-0.233198	0.0729483	0.119985
152	HIF1Alpha_Pathway	-0.233367	0.0727347	0.119985
79	Caspase_Cascade_Pathway_DNA_Fragmentation	-0.23225	0.0741539	0.121267
178	IL-2_Pathway_Apoptosis_Inhibition	-0.231071	0.0756765	0.122578
261	PTEN_Pathway_Cell_Survival	0.230963	0.0758169	0.122578
302	TRAF_Pathway_Direct_Antimicrobial_Response_and_Cell-Mediated_Immunity_and_Apoptosis_of_Host_Cell	-0.226299	0.0820936	0.131976
228	Mismatch_Repair_in_Eukaryotes_Pathway	-0.221854	0.0884504	0.141396
204	IP3_Pathway_Gene_Expression_via_CREB3_NFATC2_MEF2D	-0.220451	0.0905355	0.143921
146	HGF_Pathway_Cell_Scattering	-0.219412	0.0921044	0.144797
147	HGF_Pathway_Cell_Survival	-0.219412	0.0921044	0.144797
51	Akt_Signaling_Pathway_Translation	0.214579	0.0996818	0.155849
313	VEGF_Pathway_Nitric_Oxide_Production	-0.211155	0.105337	0.16379
343	mTOR_Pathway_Actin_Organization	0.210509	0.106431	0.164592
294	TGF-Beta_Pathway_Transciption_Arrested_Growth_Apoptosis	0.209731	0.107761	0.164857
295	TGF-Beta_Pathway_Transciption_Cell_Growth_and_Mobility_and_Angiogenesis	0.209731	0.107761	0.164857
312	VEGF_Pathway_Gene_Expression_and_Cell_Proliferation_via_MAPK7	-0.208409	0.11005	0.167459
184	ILK_Signaling_Pathway_Actin_Polymerization_Cytoskeletal_Reorganization	-0.206185	0.113983	0.170705
270	PTEN_Pathway_Protein_Synthesis	-0.206304	0.11377	0.170705
354	mTOR_Pathway_mRNA_Biogenesis	0.206304	0.11377	0.170705
163	IGF1R_Signaling_Pathway_Cell_Migration	0.205803	0.11467	0.170834
5	ATM_Pathway	-0.204313	0.117377	0.171071
107	ErbB_Family_Pathway_Anti-Apoptosis	0.203787	0.118345	0.171071
153	HIF1Alpha_Pathway_Gene_Expression_via_JUN_CREB3	-0.204761	0.116559	0.171071
176	IL-2_Pathway_Actin_Reorganization	-0.203737	0.118436	0.171071
221	MAPK_Family_Pathway_Gene_Expression_via_ATF2_JUN_ELK1_NFKB2_CREB3	-0.204103	0.117763	0.171071
347	mTOR_Pathway_Lipid_Synthesis	0.204341	0.117325	0.171071
237	NGF_Pathway_Gene_Expression_via_MYC_ELK1_CREB3_NFKB2	-0.202089	0.121509	0.173775
263	PTEN_Pathway_Differentiation	-0.202078	0.12153	0.173775
125	GSK3_Signaling_Pathway	-0.201666	0.122307	0.174013
144	HGF_Pathway_Cell_Adhesion_and_Cell_Migration	0.199304	0.126839	0.179562
286	SMAD_Signaling_Network_Pathway	-0.198164	0.12907	0.18087
337	cAMP_Pathway_Myocardial_Contraction	0.198419	0.128568	0.18087
356	p38_Signaling_Pathway_Actin_Cytoskeleton_Reorganiztion	0.19786	0.12967	0.18087
255	PTEN_Pathway	0.196025	0.133339	0.184182
304	Target_drugs_pathway	-0.19607	0.133248	0.184182
336	cAMP_Pathway_Metabolic_Energy	-0.193357	0.13881	0.190813
89	Chromatin_Pathway	0.190303	0.145277	0.198743
244	PAK_Pathway	-0.189223	0.147616	0.200977
0	AHR_Pathway	-0.186675	0.153248	0.205693
164	IGF1R_Signaling_Pathway_Cell_Proliferation_Diferentiation_and_Apoptosis	-0.187166	0.152151	0.205693
293	TGF-Beta_Pathway_Post_Transciptional_G1_Arrest	0.186809	0.15295	0.205693
238	NGF_Pathway_Neurite_Outgrowth_and_Differentiation	-0.184988	0.157065	0.209826
10	ATM_Pathway_Checkpoint_Activation	-0.184252	0.15875	0.211085
7	ATM_Pathway_Apoptosis_and_Senescence	-0.18365	0.16014	0.211131
101	ERK_Signaling_Pathway	0.183571	0.160324	0.211131
283	Ras_Pathway_Increased_T-cell_Adhesion	0.183275	0.16101	0.211131
9	ATM_Pathway_Cell_Survival	-0.182199	0.163525	0.213445
192	ILK_Signaling_Pathway_Epithelial_Mesenchymal_Transition_Tubulo-Interstitial_Fibrosis	0.17886	0.171514	0.220899
197	ILK_Signaling_Pathway_Migration_Vasculogenesis	0.17886	0.171514	0.220899
342	mTOR_Pathway	0.178839	0.171564	0.220899
126	GSK3_Signaling_Pathway_Gene_Expression_via_CTNNB1	-0.177541	0.174746	0.223982
351	mTOR_Pathway_Ribosome_Biogenesis	0.173522	0.184872	0.235898
22	Akt_Signaling_Pathway_Aggregation_and_Neurodegeneration	-0.172056	0.188667	0.237703
181	IL-2_Pathway_Protein_Synthesis	-0.172184	0.188333	0.237703
257	PTEN_Pathway_Angiogenesis_and_Tumorigenesis	0.171688	0.189628	0.237703
259	PTEN_Pathway_Ca2+_Signaling	0.171688	0.189628	0.237703
185	ILK_Signaling_Pathway_Apoptosis	0.169278	0.196014	0.244631
68	CD40_Pathway_Cell_Survival	0.166754	0.202863	0.248813
252	PPAR_Pathway_Adipocyte_Differentiation_Glucose_Homeostasis_and_Macrophage_Function	-0.166977	0.20225	0.248813
253	PPAR_Pathway_Fatty_Acid_Metabolism_Lipid_Homeostasis_and_Skin_Proliferation	-0.166977	0.20225	0.248813
254	PPAR_Pathway_Peroxisome_Proliferation_Hepatocarcinogenesis_Fatty_Acid_Metbolism_and_Lipid_Homeostasis	-0.166977	0.20225	0.248813
292	TGF-Beta_Pathway_Epithelial_Mesenchymal_Transdifferentiation	-0.163847	0.210961	0.257635
123	GPCR_Pathway	-0.161081	0.218873	0.266156
310	VEGF_Pathway_Cell_Survival	-0.15722	0.230263	0.278814
219	MAPK_Family_Pathway_Chromatin_Remodelling	-0.155718	0.234802	0.283105
109	ErbB_Family_Pathway_Translation	0.151632	0.247464	0.297113
55	BRCA1_Pathway_Base_Excission_Repair	0.148683	0.256887	0.304835
95	EGF_Pathway_Cell_Survival	-0.149113	0.255497	0.304835
166	IGF1R_Signaling_Pathway_Gene_Expression_Proliferation_Growth_Survival_via_NFAT5_CREB3	-0.148603	0.257145	0.304835
345	mTOR_Pathway_Cap-dependent_Translation	0.148284	0.258181	0.304835
171	IL-10_Pathway_IL-10_Responsive_Genes_Transcription_of_BCLXL_Cyclin-D1_D2_D3_Pim1_c-Myc_and_P19(INK4D)_via_STAT3	-0.145857	0.266139	0.311645
172	IL-10_Pathway_Inflammatory_Cytokine_Genes_Expression_via_STAT3	-0.145857	0.266139	0.311645
133	Glucocorticoid_Receptor_Signaling_Pathway_Gene_Expression_via_CREB3_STAT5B_SLC22A2_POU2F1	-0.143367	0.274477	0.318786
189	ILK_Signaling_Pathway_Cell_Motility	-0.143609	0.273658	0.318786
17	ATM_Pathway_S-phase_progression	-0.139374	0.288204	0.319132
65	BRCA1_Pathway_Transciption_Coupled_Repair	0.14259	0.277111	0.319132
140	Growth_Hormone_Signaling_Pathway_Protein_Synthesis	-0.140161	0.285463	0.319132
360	p53_Signaling_Pathway_Apoptosis	-0.139045	0.289355	0.319132
362	p53_Signaling_Pathway_Cancer	-0.139045	0.289355	0.319132
367	p53_Signaling_Pathway_Gene_Expression_Anti-Apoptosis_via_TP53	-0.139045	0.289355	0.319132
368	p53_Signaling_Pathway_Gene_Expression_Cell_Cycle_and_Cell_Growth_via_TP53	-0.139045	0.289355	0.319132
369	p53_Signaling_Pathway_Gene_Expression_Cell_Fate_and_Development_via_TP53	-0.139045	0.289355	0.319132
370	p53_Signaling_Pathway_Gene_Expression_Cell_Signaling_via_TP53	-0.139045	0.289355	0.319132
371	p53_Signaling_Pathway_Gene_Expression_DNA_Replication_and_Repair_via_TP53	-0.139045	0.289355	0.319132
372	p53_Signaling_Pathway_Gene_Expression_ECM_and_Adhesion_via_TP53	-0.139045	0.289355	0.319132
373	p53_Signaling_Pathway_Gene_Expression_Infection_and_Immune_Response_via_TP53	-0.139045	0.289355	0.319132
376	p53_Signaling_Pathway_Normal_Cell_Cycle_Progression	-0.139045	0.289355	0.319132
129	GSK3_Signaling_Pathway_b-CTNN_Degradation	0.138318	0.291909	0.319472
213	JAK-STAT_Pathway_JAK_Degradation	-0.138318	0.291909	0.319472
162	IGF1R_Signaling_Pathway_Apoptosis	0.137275	0.295599	0.322271
357	p38_Signaling_Pathway_Gene_Expression_Cell_Motility_Inflammation_Apoptosis_Osmoregulation_via_MEF2D_TP53_CREB1_ATF2_JUND_ETV1_NFKB2_AP2A1_MAX_FOSL1_CEBPG_ELK1_CDC25C_JUNB_STAT1_SP1_DDIT3_ELK4_CEBPA	0.13506	0.303532	0.329656
82	Cellular_Apoptosis_Pathway_Depolarization	0.133942	0.307592	0.33201
212	JAK-STAT_Pathway_IFN-Inducible_Gene_Expression_via_STAT2_STAT1	0.133657	0.30863	0.33201
326	cAMP_Pathway_Cell_Survival	-0.133284	0.309996	0.33201
355	p38_Signaling_Pathway	-0.133183	0.310366	0.33201
303	TRAF_Pathway_Gene_Expression_via_FOS_JUN	-0.12969	0.323339	0.344592
96	EGF_Pathway_Cytoskeleton_Regulation	0.127777	0.330588	0.351003
173	IL-10_Pathway_Stability_Determination	0.125208	0.340484	0.360166
325	cAMP_Pathway_Cell_Proliferation	0.122304	0.351886	0.370849
287	STAT3_Pathway	-0.120512	0.359042	0.376994
319	WNT_Pathway_Gene_Expression_via_CREB3	-0.119829	0.361789	0.378482
120	FLT3_Signaling_Pathway	-0.115072	0.381297	0.397429
315	WNT_Pathway	0.113468	0.388013	0.402953
16	ATM_Pathway_S-phase_arrest	0.112267	0.39309	0.405094
145	HGF_Pathway_Cell_Cycle_Progression	-0.111971	0.394346	0.405094
341	cAMP_Pathway_eNOS_Signaling_Cardiovascular_Homeostasis	0.112487	0.392159	0.405094
93	EGF_Pathway_Actin_Cytoskeletal_Rearrangement	0.111431	0.396643	0.405893
318	WNT_Pathway_Cytoskeletal_Rearrangement	-0.111119	0.397977	0.405893
134	Glucocorticoid_Receptor_Signaling_Pathway_Histone_Deacetylation	0.109843	0.403452	0.410008
132	Glucocorticoid_Receptor_Signaling_Pathway_Cell_Cycle_Progression	-0.107769	0.412443	0.417654
85	Chemokine_Pathway	-0.107117	0.415291	0.419046
344	mTOR_Pathway_Autophagy	0.10626	0.419055	0.42135
47	Akt_Signaling_Pathway_Regulation_of_Na+_Transport	-0.105652	0.421734	0.422551
3	AHR_Pathway_Cath_D_expression_via_SP1	-0.104736	0.425794	0.425121
130	Glucocorticoid_Receptor_Signaling_Pathway	-0.103972	0.429196	0.425585
291	TGF-Beta_Pathway	0.10396	0.429249	0.425585
183	ILK_Signaling_Pathway	0.102174	0.437261	0.432023
26	Akt_Signaling_Pathway_Cell_Cycle	0.100165	0.446377	0.439403
203	IP3_Pathway	0.0998489	0.447819	0.439403
248	PAK_Pathway_Lamelliopodia_and_Filopodia_Outgrowth	-0.097766	0.457394	0.447256
266	PTEN_Pathway_Migration	-0.0965911	0.462844	0.451035
61	BRCA1_Pathway_Homologous_Recombination_Repair	-0.0934384	0.477641	0.463866
206	Interferon_Pathway_Gene_Expression_via_HIST1H3B_CREB3	0.092868	0.480345	0.464905
241	Notch_Signaling_Pathway_Gene_Expression_Chromatin_Remodeling_via_RBPJ	-0.0901214	0.493478	0.474389
242	Notch_Signaling_Pathway_Transcription_of_Target_Genes_Hairy_E-SpI_via_RBPJ	-0.0901214	0.493478	0.474389
48	Akt_Signaling_Pathway_Splicing_Regulation	-0.0886286	0.500693	0.478238
54	BRCA1_Pathway	-0.0885976	0.500844	0.478238
179	IL-2_Pathway_Gene_Expression_via_FYN_LYN_RPS6KB1_PTK2B	-0.0877232	0.505096	0.480266
211	JAK-STAT_Pathway_Gene_Expression_via_MYC	0.0874674	0.506343	0.480266
267	PTEN_Pathway_Neuronal_Survival	-0.0868602	0.50931	0.481476
91	Cytokine_Network_Pathway	-0.0832342	0.527213	0.49675
256	PTEN_Pathway_Adhesion_or_Migration	0.0821759	0.532497	0.500073
88	Chemokine_Pathway_Internalization_Degradation_Recycling	-0.0797756	0.544576	0.509734
348	mTOR_Pathway_Metabolism_Stress_Response_and_Apoptosis	0.075263	0.567639	0.529579
87	Chemokine_Pathway_Gene_Expression_and_Apoptosis_via_ELK1	-0.0711628	0.58898	0.54068
187	ILK_Signaling_Pathway_Cell_Cycle_Proliferation	-0.0711516	0.589039	0.54068
193	ILK_Signaling_Pathway_G2_Phase_Arrest	-0.0711516	0.589039	0.54068
194	ILK_Signaling_Pathway_Induced_Cell_Proliferation	-0.0712013	0.588778	0.54068
207	Interferon_Pathway_Transciption	0.0718911	0.585163	0.54068
6	ATM_Pathway_Apoptosis	0.0694104	0.59821	0.547333
333	cAMP_Pathway_Glycogen_Synthesis	-0.0685124	0.602964	0.549915
121	FLT3_Signaling_Pathway_Transcription_via_ELK3_MAPK12_CREB3_STAT2	-0.0679212	0.606103	0.551011
11	ATM_Pathway_DNA_repair	-0.0664553	0.613917	0.551291
58	BRCA1_Pathway_E2_Responsive_Genes	0.0661358	0.615625	0.551291
214	JAK-STAT_Pathway_Nml_SOCS_BCL-XL_p21_Myc_Nos2_Gene_Expression_via_STAT2	0.0660476	0.616098	0.551291
282	Ras_Pathway_Golgi_Trafficking_and_Vesicle_Formation	-0.06699	0.611062	0.551291
317	WNT_Pathway_Cell_Survival	0.0671116	0.610413	0.551291
272	PTEN_Pathway_Synaptic_Transmission	-0.0635616	0.629467	0.561488
80	Cellular_Apoptosis_Pathway	-0.0630041	0.632482	0.562415
262	PTEN_Pathway_DNA_Repair	-0.057747	0.661195	0.586116
191	ILK_Signaling_Pathway_Epithelial_Mesenchymal_Transition	-0.0560662	0.670482	0.58906
361	p53_Signaling_Pathway_Breast_Cancer	-0.0545309	0.679008	0.58906
363	p53_Signaling_Pathway_Cell_Cycle_Arrest	-0.0545309	0.679008	0.58906
364	p53_Signaling_Pathway_Cell_Growth_Accumulation	-0.0545309	0.679008	0.58906
365	p53_Signaling_Pathway_DNA_Repair	-0.0545309	0.679008	0.58906
366	p53_Signaling_Pathway_Exosome_Mediated_Secretion	-0.0545309	0.679008	0.58906
374	p53_Signaling_Pathway_Inhibition_of_Angiogenesis_and_Metastasis	-0.0545309	0.679008	0.58906
2	AHR_Pathway_CYP1A1_CYP1B1_CYP1A2_AHRR_gene_expression_via_POLR2B	-0.0524472	0.690643	0.597229
195	ILK_Signaling_Pathway_Loss_of_Occludin_Barrier_Dysfunction	-0.0510716	0.698364	0.597229
223	MAPK_Signaling_Pathway	0.0515093	0.695904	0.597229
230	Mitochondrial_Apoptosis_Pathway_Apoptosis	-0.052025	0.693009	0.597229
331	cAMP_Pathway_Fatty_Acid_Metabolism	-0.0509729	0.698919	0.597229
264	PTEN_Pathway_Genomic_Stability	-0.050246	0.703012	0.598928
215	JNK_Pathway	-0.0497649	0.705726	0.599446
86	Chemokine_Pathway_Cell_Activation	-0.0480043	0.715688	0.606098
245	PAK_Pathway_Actin_Organization	-0.0472227	0.720126	0.606248
246	PAK_Pathway_Cell_Survival	-0.0472227	0.720126	0.606248
141	HA_syntesis_pathway	-0.0451612	0.731874	0.614321
306	Ubiquitin-Proteasome_Dependent_Proteolysis_Pathway	0.040871	0.756519	0.63314
188	ILK_Signaling_Pathway_Cell_Migration_Retraction	0.038505	0.770216	0.642713
83	Cellular_Apoptosis_Pathway_Gene_Expression_BAX_BID_BAK_Ras_Noxa_PUMA_APAF1_Survivin_BCL2_via_TP53	0.0374295	0.776465	0.646033
268	PTEN_Pathway_Proliferation	-0.0368017	0.78012	0.647181
118	Estrogen_Pathway_Anti-Apoptosis	0.0360594	0.784447	0.648879
208	Interferon_Pathway_Translation	0.035447	0.788022	0.649042
350	mTOR_Pathway_Mitochondria_Proliferation_and_Function	0.0352443	0.789206	0.649042
324	cAMP_Pathway_Cell_Growth	-0.0340498	0.796194	0.652902
359	p53_Signaling_Pathway	-0.0305971	0.816482	0.667615
161	IGF1R_Signaling_Pathway	-0.0297746	0.821332	0.667743
182	IL-6_Pathway	0.0299149	0.820504	0.667743
59	BRCA1_Pathway_G1_S_arrest	-0.0245214	0.852465	0.668425
63	BRCA1_Pathway_NHEJ_DSB_Repair	-0.026324	0.841754	0.668425
76	CREB_Pathway	-0.0253715	0.84741	0.668425
117	Estrogen_Pathway	0.0249984	0.849628	0.668425
159	Hedgehog_Signaling_in_Mammals_no_Tubulin_Pathway	-0.025094	0.84906	0.668425
160	Hypoxia_induced_EMT_in_cancer_and_fibrosis_3_copy	-0.0255588	0.846298	0.668425
174	IL-10_Pathway_Translational_Modulation	0.0276365	0.833973	0.668425
209	JAK-STAT_Pathway	-0.02708	0.837271	0.668425
225	MAPK_Signaling_Pathway_Cell_Survival	0.0252026	0.848414	0.668425
249	PAK_Pathway_Paxillin_Disassembly	0.0252175	0.848326	0.668425
251	PPAR_Pathway	0.0247247	0.851256	0.668425
327	cAMP_Pathway_Chemotaxis	-0.0244805	0.852708	0.668425
340	cAMP_Pathway_Regulation_of_Cytoskeleton	0.0256327	0.845859	0.668425
335	cAMP_Pathway_Lipolysis	0.0239673	0.855763	0.668976
218	MAPK_Family_Pathway	0.0220692	0.867078	0.675964
298	TNF_Signaling_Pathway_Gene_Expression_and_Cell_Survival_via_FOS_NFKB2_JUN_ELK1_ATF6	-0.020188	0.878318	0.682856
277	Ras_Pathway	-0.0173323	0.895426	0.690689
280	Ras_Pathway_Cell-Cell_Junctions	0.0178672	0.892218	0.690689
328	cAMP_Pathway_Cytokine_Production	0.0172909	0.895675	0.690689
106	ErbB_Family_Pathway	-0.0149916	0.909485	0.699443
167	IGF1R_Signaling_Pathway_Glucose_Uptake	0.0132941	0.919698	0.705391
201	ILK_Signaling_Pathway_Tumor_Angiogenesis	0.00992696	0.939993	0.719019
119	Estrogen_Pathway_Gene_Expression_via_FOS_JUN_ELK1_SP1_POLR2B_CREB3_NFKB2	-0.00639506	0.961322	0.733363
322	cAMP_Pathway	0.00577118	0.965093	0.734271
285	Ras_Pathway_RhoA_Pathway	0.00489461	0.970392	0.736334
62	BRCA1_Pathway_Mismatch_Repair	-0.00389145	0.976459	0.738966
19	Akt_Signaling_Pathway	-0.00241133	0.985411	0.743763

## Sheet: Лист1
Pathway	R	p-value	p-value adjusted
Akt_Signaling_Pathway_Protein_Synthesis	-0.540925	8.1179e-06	0.000329993
Akt_Signaling_Pathway_JNK_mediated_apoptosis	-0.491666	6.62397e-05	0.00157071
Akt_Signaling_Pathway_Tumor_Supression	-0.450861	0.000300168	0.00449541
Akt_Signaling_Pathway_Blocks_Apoptosis	-0.445603	0.00035983	0.00465764
Akt_Signaling_Pathway_p73_mediated_apoptosis	-0.447395	0.000338385	0.00465764
Akt_Signaling_Pathway_Proto-Oncogenic_and_RTK-signaling	-0.442714	0.000397025	0.00491189
Akt_Signaling_Pathway_Cell_Cycle_Progression	-0.437419	0.000474413	0.00494783
Akt_Signaling_Pathway_Enhancement_of_Breast_Epithelial	-0.43456	0.000521648	0.00494783
Akt_Signaling_Pathway_Increased_GLUT4_translocation	-0.43456	0.000521648	0.00494783
Akt_Signaling_Pathway_Induction_of_Chromatin_Condensation	-0.43456	0.000521648	0.00494783
Akt_Signaling_Pathway_NO_production	-0.43456	0.000521648	0.00494783
Akt_Signaling_Pathway_Promotes_Adipogenesis	-0.43456	0.000521648	0.00494783
Akt_Signaling_Pathway_ERK_mediated_apoptosis	-0.433328	0.0005433	0.00498697
Akt_Signaling_Pathway_Apoptosis	-0.426821	0.000671741	0.00550427
Akt_Signaling_Pathway_Neuroprotection	-0.425619	0.00069827	0.00551924
Akt_Signaling_Pathway_Elevation_of_Glucose_Import	-0.424441	0.000725207	0.00557723
Akt_Signaling_Pathway_NF-kB_pathway	-0.420269	0.000828256	0.00604308
Akt_Signaling_Pathway_Genetic_Stability	-0.418192	0.000884349	0.0061376
Akt_Signaling_Pathway_AR_mediated_apoptosis	-0.416534	0.000931548	0.00619116
Akt_Signaling_Pathway_Acetylation_of_proteins	-0.403994	0.00136886	0.00846758
Akt_Signaling_Pathway_NFAT_degradation	-0.397069	0.00168249	0.00997399
Akt_Signaling_Pathway_Blood_cell_differentiation	-0.387285	0.00223521	0.010284
Akt_Signaling_Pathway_NF-kB_dependent_transciption	-0.358824	0.00487188	0.017773
Akt_Signaling_Pathway_Glycogen_Synthesis_and_Apoptosis	-0.349988	0.00612054	0.0206219
Akt_Signaling_Pathway_Regulation_of_Cyclic_Nucleotide	-0.332101	0.00953201	0.0282535
Akt_Signaling_Pathway_Survival_Genes	-0.317967	0.0132948	0.035689
Akt_Signaling_Pathway_Cell_Survival	-0.300414	0.0196903	0.0483006
Mitochondrial_Apoptosis_Pathway_DNA_Fragmentation	0.520735	1.99662e-05	0.000703081
Cellular_Apoptosis_Pathway_Gene_Expression_FLIP_CIAP2_BFL1_BCL2_via_NFKB2	-0.389405	0.00210332	0.010284
Mitochondrial_Apoptosis_Pathway_Gene_Expression_via_TP53	0.365984	0.00403055	0.0156565
Mitochondrial_Apoptosis_Pathway_Depolarization	0.325973	0.0110315	0.0310048
Mitochondrial_Apoptosis_Pathway	-0.311494	0.0154067	0.0402201
cAMP_Pathway_Endothelial_Cell_Regulation	0.510267	3.11395e-05	0.000848229
cAMP_Pathway_Glycolisis	-0.385302	0.00236524	0.0105011
cAMP_Pathway_Oncogenesis	0.351768	0.00584859	0.0203227
CD40_Pathway_Gene_Expression_COX2_and_Prostaglandins_via_NFKB2	-0.389405	0.00210332	0.010284
CD40_Pathway	-0.353477	0.00559748	0.0199095
CD40_Pathway_Gene_Expression_Cell_Adhesion_Molecule_via_NFKB2	-0.389405	0.00210332	0.010284
CD40_Pathway_Gene_Expression_Cell_Survival_via_NFKB2	-0.389405	0.00210332	0.010284
CD40_Pathway_Gene_Expression_Co-Stimulatory_Molecules_via_NFKB2	-0.389405	0.00210332	0.010284
CD40_Pathway_Gene_Expression_Immunoglobulin_Class_Switch_via_NFKB2	-0.389405	0.00210332	0.010284
CD40_Pathway_Gene_Expression_Pro-Inflamatory_Cytokines_via_NFKB2	-0.389405	0.00210332	0.010284
CD40_Pathway_Gene_Expression_Procoagulant_Activity_via_NFKB2	-0.389405	0.00210332	0.010284
Glucocorticoid_Receptor_Signaling_Pathway_Cell_Cycle_Arrest	0.62235	1.10483e-07	1.57189e-05
ATM_Pathway_G2-Mitosis_progression	-0.461846	0.00020358	0.00362055
ATM_Pathway_G2_M_Checkpoint_Arrest	-0.461846	0.00020358	0.00362055
ATM_Pathway_Cell_Cycle_Checkpoint_Control	-0.354689	0.00542513	0.0195408
BRCA1_Pathway_Cell_Cycle_Arrest_DNA_Repair_Genes_p21_WAF_CIP1_14-3-3_GADD45	0.328192	0.0104666	0.0300835
cAMP_Pathway_Degradation_of_Cell_Cycle_Regulators	-0.299697	0.0199992	0.048639
BRCA1_Pathway_Growth_Promoting_Genes_hTert_S100A7	0.388747	0.00214349	0.010284
BRCA1_Pathway_Nucleotide_Excission_Repair	0.386652	0.00227603	0.010284
EGF_Pathway_Gene_Expression_via_FOS_NFKB2_MYC_STAT1_ELK1_STAT3_JUN	-0.426578	0.000677032	0.00550427
EGF_Pathway_EGFR_Endocytosis	0.365605	0.00407162	0.0156565
EGF_Pathway	-0.351474	0.0058928	0.0203227
EGF_Pathway_Rab5_Regulation_Pathway	-0.337924	0.00827454	0.0253174
EGF_Pathway_IP3_Signaling	0.302997	0.0186103	0.0464523
Erythropoietin_Pathway_BCLXL_Gene_Expression_via_STAT5B	-0.562034	2.97085e-06	0.000140893
Erythropoietin_Pathway_GPI_Hidrolysis_and_Ca2+_influx	-0.480143	0.000103486	0.00226514
Erythropoietin_Pathway	-0.454066	0.00026838	0.00424264
Erythropoietin_Pathway_Cell_Survival	-0.36843	0.00377409	0.0149155
Erythropoietin_Pathway_Gene_Expression_Neuroprotection_via_NFKB2	-0.364473	0.00419653	0.0157479
Erythropoietin_Pathway_Anti-Apoptosis	0.337159	0.00843094	0.0255215
ErbB_Family_Pathway_Gene_Expression_via_JUN_FOS_ELK1	-0.384806	0.00239878	0.0105011
FLT3_Signaling_Pathway_Translation	0.329267	0.0102018	0.0296217
GPCR_Pathway_Gene_Expression_via_JUN_NFKB2_ELK1_SRF_FOS_CREB3	-0.420717	0.000816586	0.00604308
Growth_Hormone_Signaling_Pathway_Gene_Expression_via_SRF_ELK1_STAT5B_CEBPD_STAT1_STAT3	-0.419263	0.000855002	0.00608227
Growth_Hormone_Signaling_Pathway	-0.415367	0.000966134	0.00624803
Growth_Hormone_Signaling_Pathway_Cell_Survival	-0.307229	0.0169502	0.043064
GSK3_Signaling_Pathway_Glycogen_Synthesis	-0.338637	0.00813084	0.0253174
GSK3_Signaling_Pathway_Protein_Synthesis	-0.309033	0.0162817	0.0421179
HGF_Pathway_Regulation_of_Cytoskeleton_Cell_Polarity_and_Cell_Motility	-0.438166	0.000462715	0.00494783
HGF_Pathway_PKC_Pathway	-0.325657	0.011114	0.0310048
HGF_Pathway_IP3_Pathway	-0.31997	0.012694	0.0347314
IL-2_Pathway	-0.456091	0.000249917	0.00418317
IL-2_Pathway_Apoptosis	0.344071	0.00710631	0.0229784
IL-2_Pathway_IL2_Gene_Expression_via_POLR1E_EGR1_HMGA1_ELF1_POU2F1_MYC	-0.319348	0.0128781	0.0348995
ILK_Signaling_Pathway_Opsonization	0.431522	0.00057651	0.00512644
ILK_Signaling_Pathway_Cell_Adhesion	0.376628	0.00301669	0.0124406
ILK_Signaling_Pathway_Regulation_of_Junction_Assembly_at_Desmosomes	0.376628	0.00301669	0.0124406
ILK_Signaling_Pathway_Wound_Healing	0.376628	0.00301669	0.0124406
JNK_Pathway_Insulin_Signaling	-0.416396	0.000935583	0.00619116
JNK_Pathway_Gene_Expression_Apoptosis_Inflammation_Tumorigenesis_Cell_Migration_via_SMAD4_STAT4_HSF1_TP53_MAP2_DCX_ATF2_NFATC3_SPIRE1_MAP1B_TCF15_ELK1_BCL2_JUN_PXN_NFATC2	-0.322882	0.0118623	0.0327711
MAPK_Signaling_Pathway_Gene_Expression_Cell_Proliferation_Cell_Survival_Tumorigenesis_Differentiation_Development_via_PXN_CREB3_RPS6KA5_RPS6KA6	0.387843	0.00219981	0.010284
Ras_Pathway_Apoptosis	-0.386638	0.00227691	0.010284
Ras_Pathway_Gene_Expression_Cell_Proliferation_Cell_Survival_Differentiation_Development_Cell_Cycle_Control_Cell_Motility_Tumorigenesis_via_ELK4_ATF2_MEF2D_STAT2_CREB3_CCNA1_MYC_ELK1_JUN_CDK4	0.394725	0.0018024	0.010284
MAPK_Signaling_Pathway_Gene_Expression_Apoptosis_Inflammation_Tumorigenesis_via_MYC_HSF1_STAT2	-0.364387	0.00420609	0.0157479
ERK_Signaling_Pathway_Cell_Survival	0.351242	0.0059279	0.0203227
ERK_Signaling_Pathway_Gene_Expression_via_CAPN6_TP53_FOS_ATF1_MYC_ELK3_MYLK_ETS1_SRF_HIST1H3B_CREB3_STAT3_NFKB2_HMGN1_ESR2_ELK1_PAX6_JUN	0.338149	0.0082289	0.0253174
Ras_Pathway_CDC42_Pathway	-0.313392	0.0147596	0.0392509
MAPK_Signaling_Pathway_Cell_Motility_Inflammation_Apoptosis_Osmoregulation	0.311698	0.0153359	0.0402201
mTOR_Pathway_Translation_Elongation	0.3914	0.00198555	0.010284
NGF_Pathway_Actin_Polymerization_Neurite_Outgrowth_and_Differentiation	-0.570016	1.99461e-06	0.000139512
NGF_Pathway_Apoptosis	-0.518228	2.22377e-05	0.000703081
NGF_Pathway	-0.336016	0.00866959	0.0259677
Notch_Signaling_Pathway_gamma_Secretase	-0.594232	5.57244e-07	5.28546e-05
Tumour_Infiltration_Pathway	-0.509028	3.27904e-05	0.000848229
RANK_Signaling_in_Osteoclasts_Pathway_Resorption	-0.473329	0.000133736	0.00271818
RANK_Signaling_in_Osteoclasts_Pathway	-0.409824	0.00114668	0.00725086
RANK_Signaling_in_Osteoclasts_Pathway_Expression_of_Osteoclastic_Genes_via_JUN_NFAT5_NFKB2_MITF_FOS	-0.402593	0.00142772	0.00864379
ATM_Pathway_Synaptic_Vesicle_Transport	-0.339128	0.00803337	0.0253174
Caspase_Cascade_Pathway_Activated_Tissue_Trans-glutaminase	0.304849	0.0178676	0.0449932
p53_Signaling_Pathway_Inhibition_of_IGF1R_mTOR_Pathways	0.307693	0.0167761	0.0430057
PAK_Pathway_Contractility_Stress_Fibres_and_Focal_Adhesion	-0.56591	2.45146e-06	0.000139512
PAK_Pathway_Transciptional_Activation_and_Filopodia_Formation	-0.369403	0.00367611	0.0147329
PTEN_Pathway_Apoptosis	0.326226	0.0109657	0.0310048
STAT3_Pathway_Anti-Apoptosis	-0.427822	0.000650336	0.00550427
STAT3_Pathway_Growth_Arrest_and_Differentiation	-0.349735	0.00616013	0.0206219
STAT3_Pathway_G1_to_S_Cell_Cycle_Progression	0.339357	0.0079882	0.0253174
TNF_Signaling_Pathway_Apoptosis	-0.302512	0.0188092	0.0465405
TRAF_Pathway_Apoptosis	-0.360247	0.00469322	0.0173436
VEGF_Pathway	-0.445581	0.000360105	0.00465764
VEGF_Pathway_Prostaglandin_Production	-0.38053	0.00270615	0.0116672
VEGF_Pathway_Actin_Reorganization	-0.347002	0.00660184	0.0215926
VEGF_Pathway_Cell_Migration	-0.347002	0.00660184	0.0215926
VEGF_Pathway_Focal_Adhesion_Turnover	-0.330386	0.00993261	0.0291374
WNT_Pathway_NFAT_Pathway	-0.671271	4.36206e-09	1.24122e-06
WNT_Pathway_Cell_Fate_Proliferation_Differentiation_Adhesion_and_Survival	0.372172	0.00340965	0.0138602
