# Supplementary material for: Subtype of Neuroblastoma Cells with High KIT Expression Are Dependent on KIT and Its Knockdown Induces Compensatory Activation of Pro-Survival Signaling
Source: Int J Mol Sci. 2022 Jul 13;23(14):7724. doi: 10.3390/ijms23147724 (PMC9324519; doi:10.3390/ijms23147724)
Supplement: Supplementary file 1 [file ijms-23-07724-s001.zip › Table S4.xlsx]

## Sheet: PAL
Pathway name	SH-SY5Y shKIT		SK-N-AS shKIT
	day 3	day 6	day 3	day 6
AHR Main Pathway	1.91266	3.44565	2.71533	0.885801
AHR Pathway (AHR Degradation)	0	1.5638	0.512931	0.419149
AHR Pathway (C-MycExpression)	1.91266	2.77436	2.2024	0.466651
AHR Pathway (Cath-D Expression)	3.51033	2.77436	0.132539	0.466651
AHR Pathway (PS2 Gene Expression)	1.34955	2.65537	1.56798	0.466651
AKT Main Pathway	13.572	39.5232	9.47352	-0.523844
AKT Pathway (Aggregation & Neurodegeneration)	1.01278	5.86844	1.01959	0
AKT Pathway (Apoptosis Inhibition)	-0.440569	6.99372	0.798154	0
AKT Pathway (Blocks Apoptosis)	-0.403391	-4.16514	0	0
AKT Pathway (Cardiovascular Homeostasis)	0.460791	4.99173	1.1161	0
AKT Pathway (Caspase Cascade)	0.460791	2.75899	0.435811	0
AKT Pathway (Cell Cycle)	-0.897767	-3.24036	0.412637	-0.450972
AKT Pathway (Cell Cycle Progression)	-0.126739	1.76023	1.62766	0
AKT Pathway (Cell Survival)	0	2.22261	0	0
AKT Pathway (Death Genes)	0.460791	3.52004	1.05718	0
AKT Pathway (Elevation of Glucose Import)	0.460791	2.77348	1.05718	0
AKT Pathway (ERK Pathway)	-0.403391	-2.33786	0	0.548324
AKT Pathway (Genetic Stability)	-0.126739	1.76023	0.953222	0
AKT Pathway (Glucose Uptake)	0.460791	4.46777	0.595074	0
AKT Pathway (Glycogen Synthesis)	0.546589	-0.237208	0.00404703	0
AKT Pathway (Insulin Stimulated Mitogenesis)	0.460791	4.46777	0.595074	0
AKT Pathway (JNK Pathway)	0.460791	3.30751	1.05718	0
AKT Pathway (Neuroprotection)	0.460791	4.46777	1.0899	0
AKT Pathway (NF-kB Pathway)	0.460791	5.03862	1.92703	0
AKT Pathway (p53 Degradation)	0.414198	0.287915	0	0
AKT Pathway (p73 Mediated Apoptosis)	0.460791	2.27282	1.05718	0
AKT Pathway (Protein Synthesis)	0	0	0.419985	0
AKT Pathway (Regeneration of Cyclic Nucleotide)	0.460791	0.509746	0.618183	0
AKT Pathway (Respiratory Burst)	0.460791	4.46777	1.0899	0
AKT Pathway (Survival Genes)	0.0700479	-1.45115	0	0
AKT Pathway (Synaptic Signaling)	0.02037	2.86114	2.73749	0
AKT Pathway (Translation)	0.520592	1.17315	0	0
Androgen Receptor Pathway	10.3817	33.3898	-2.52252	2.41923
Androgen Receptor Pathway (Apoptosis)	0.864183	5.13716	1.05718	0
Androgen Receptor Pathway (Degradation)	1.71532	-5.00051	-2.92085	1.02995
Androgen Receptor Pathway (Cell Survival & Cell Growth)	-0.416751	2.97754	1.32822	0
Androgen Receptor Pathway (Gonadotropin Regulation)	1.83811	2.45258	1.82437	0.885801
Androgen Receptor Pathway (Histone Modification)	1.83811	2.45258	1.82437	0.885801
Androgen Receptor Pathway (Prostate Differentiation & Development)	1.83811	2.45258	1.82437	0.885801
Androgen Receptor Pathway (Sexual Differentiation & Sexual Maturation at Puberty)	1.83811	2.45258	1.82437	0.885801
ATM Main Pathway	2.97813	3.84468	-0.633348	-0.615722
ATM Pathway (Apoptosis)	0	1.47842	0	0
ATM Pathway (Apoptosis, Senescense)	0.414198	1.11	0	0
ATM Pathway (Cell Cicle Checkpoint Control)	0	0.0450772	0	0
ATM Pathway (Cell Survival)	1.10183	1.30656	0	0
ATM Pathway (Checkpoint Activation)	0	-1.2443	0	0
ATM Pathway (DNA Repair)	1.46211	1.93676	-0.403578	0
ATM Pathway (G2 Mitosis Progression)	0	0	-0.674436	0
ATM Pathway (G2_M Checkpoint Arrest)	0.414198	1.10839	0	0
ATM Pathway (MDMX Ubiquitination, Degradation)	0	0	0	0
ATM Pathway (NF-kB Pathway)	0	-1.04282	0.444666	0
ATM Pathway (S-Phase Arrest)	0	-0.97511	0	0
ATM Pathway (S-Phase Progression)	0.69655	0	-0.674436	-0.615722
ATM Pathway (Synaptic Vesicle Transport)	0	-1.04282	0.444666	0
DDR Pathway (BRCA1-induced responses)	5.09097	2.49314	-0.717722	0.450972
BRCA1 Main Pathway	5.88769	-3.13553	-2.97636	-0.460804
cAMP Main Pathway	17.1083	37.9591	3.36307	3.30851
cAMP Pathway (Axonal Growth)	-1.12903	-1.09217	0.321432	0.25118
cAMP Pathway (Cardiovascular Homeostasis)	0.112103	-0.39879	-0.245232	0.25118
cAMP Pathway (Cell Growth)	0	1.3399	0	0
cAMP Pathway (Cell Proliferation)	0.112103	-1.21699	-0.245232	0.25118
cAMP Pathway (Cell Survival)	2.4179	-1.51362	-0.605615	1.2763
cAMP Pathway (Cell Survival, Chemotaxis)	0.520592	2.51305	0	0
cAMP Pathway (Cytokine Production)	0	1.96414	0	0
cAMP Pathway (Degradation of Cell Cycle Regulators)	0.0446577	-5.3315	-1.03831	1.22105
cAMP Pathway (Endothelial Cell Regulation)	-0.996403	-0.228261	0.979189	0
cAMP Pathway (Glycogen Synthesis)	0.112103	-1.73869	-0.245232	0.25118
cAMP Pathway (Glycolysis)	1.04973	-1.16672	-0.226999	1.19287
cAMP Pathway (Metabolic Energy)	0.864183	4.39906	1.05718	0
cAMP Pathway (Myocardial Contraction)	1.91143	1.31706	2.06593	-0.586687
cAMP Pathway (Oncogenesis)	0.112103	-0.526096	-0.657869	0.25118
cAMP Pathway (Protein Retention)	-0.295742	-1.00781	-0.245232	0.25118
cAMP Pathway (Regulation of Cytoskeleton)	0.112103	-1.2234	-0.245232	0.25118
Caspase Cascade Main	-8.32813	-21.283	-2.02172	-1.91539
Caspase Cascade (Activated Tissue Transglutaminase)	-0.233996	3.12201	0.781814	-1.37348
Caspase Cascade (Apoptosis)	-0.4028	-4.7098	0.124954	0
Caspase Cascade (Cell Survival)	-1.42195	0.196111	0.697903	0
Caspase Cascade (ICAD Degradation)	-0.4028	-3.45841	0.172951	0
CD40 Main Pathway	2.42943	7.12979	3.99101	0
CD40 Pathway (Cell Survival)	0.957967	2.84614	0.407694	0
CD40 Pathway (Gene Expression)	1.20206	3.75824	1.96637	0
CD40 Pathway (IKBs Degradation)	-0.660893	-0.125654	2.52615	0
Cellular Anti Apoptosis Main Pathway	7.1523	16.7532	0.521268	-2.12428
Cellular Anti Apoptosis Pathway (Apoptosis)	0.2424	6.45118	0.218892	-0.519355
Cellular Anti Apoptosis Pathway (Depolarization)	0.850701	0.674247	0	0
Chemokine Main Pathway	5.94349	18.9043	-1.1353	2.65697
Chemokine Pathway (Cell Activation)	2.20429	1.23376	-0.0106743	0
Chemokine Pathway (Gene Expression, Apoptosis)	1.89664	0.999275	-0.466778	0.779659
Chemokine Pathway (Internalization, Degradation, Recycling)	-0.490126	4.7408	-0.420461	0
Chromatin Main Pathway	2.79335	-0.880278	-1.23216	0
Chromatin Pathway (Octamer Sliding)	3.27991	-0.862118	-1.23216	0
Chromatin Pathway (Octamer Transfer)	2.79335	-0.880278	-1.23216	0
Circadian Main Pathway	1.10164	0.560097	-0.997932	0.456113
CREB Main Pathway	6.4671	23.9495	3.23768	-0.804412
CREB Pathway (Gene Expression Pathway)	2.59708	4.10197	1.94051	0.466651
Cytokine Main Pathway	0.059163	-0.414792	-1.20683	-0.325297
DDR pathway Apoptosis	1.11075	2.02394	1.70422	0
DDR Main pathway	1.11075	1.44267	0.674436	0
DNA Repair Mechanisms Pathway	5.245	4.75444	0.497009	0.123584
EGFR Main Pathway	1.34255	5.12924	1.36711	2.56227
ErbB Family Main Pathway	2.13043	11.6896	-0.120048	1.31446
ErbB Family Pathway (Anti-Apoptosis)	0	2.39852	0	0
ERK Signaling Main Pathway	15.5952	37.2664	5.68004	-3.42658
Erythropoeitin Main Pathway	7.07516	17.3322	3.17711	0.87701
Estrogen Main Pathway	11.6889	33.5133	4.76863	0.895525
Fas Signaling Pathway (Negative)	-1.35723	7.55199	1.13077	0.419149
Fas Signaling Pathway (Positive)	0.412243	-0.0444334	1.89173	0
FLT3 Main Pathway	4.00011	13.3476	2.18212	1.32798
G-protein Pathway (Ras family GTPases)	2.11051	8.52438	0	0.548324
Glucocorticoid Receptor Main Pathway	11.5268	-4.37924	2.49185	0.340551
Glucocorticoid Receptor Pathway (Cell cycle arrest)	0	0.464307	0	0
Glucocorticoid Receptor Pathway (Cell cycle progression)	0	0.690779	0	0
Glucocorticoid Receptor Pathway (Gene expression)	8.37286	5.03902	1.28845	1.20628
Glucocorticoid Receptor Pathway (Inflammatory cytokines)	4.16554	-6.45835	-0.726749	-0.865733
Glucocorticoid Receptor Pathway (SMAD signaling)	-1.42384	-3.33154	1.73493	0.419149
GPCR Main Pathway	10.6503	35.2715	5.51592	3.26096
GPCR Pathway (Gene expression)	0.74239	2.0213	4.17708	0
Growth Hormone Main Pathway	3.49624	5.22416	0.377707	0
Growth Hormone Pathway (Cell survival)	0	0.548818	0	0
Growth Hormone Pathway (Gene expression)	4.05403	5.53408	0.673896	0
Growth Hormone Pathway (Glucose uptake)	3.49624	5.22416	0.377707	0
Growth Hormone Pathway (Protein synthesis)	0	0.548818	0	0
GSK3 Main Pathway	10.4611	20.2215	4.21585	-0.817983
GSK3 Pathway (Degradation)	0.451649	-2.99967	0.581875	0.578982
GSK3 Pathway (Gene expression)	-0.434979	2.06799	1.42657	0
GSK3 Pathway (Translation)	0.911738	3.34983	-0.928969	0
Hedgehog Main Pathway	-1.0354	-0.485028	0.87052	0
Hedgehog Pathway (Repression of Hh, BMP)	0.552332	-5.56034	-1.8822	0.235203
Hedgehog Pathway (Activation of BMP, Ptc, WNT)	-0.485891	-1.24431	0	0
HGF Main Pathway	4.6134	2.55404	1.62817	2.27987
HGF Pathway (Anoikis)	1.00186	0.0548253	0.0936621	0
HGF Pathway (Cell adhesion, cell mirgation)	3.17118	7.06617	0.957016	0.951884
HGF Pathway (Cell cycle progression)	-0.477882	-0.510637	0	0
HGF Pathway (Cell polarity, cell motility)	0	1.23373	0	0
HGF Pathway (Cell scattering)	1.47974	3.06526	0.0936621	0
HGF Pathway (Cell survival)	1.47974	3.06526	0.0936621	0
HGF Pathway (IP3 pathway)	1.47974	2.08988	0.0936621	0
HGF Pathway (PKC pathway)	0	-0.0175188	0	0
HIF1-Alpha Main Pathway	3.0958	-0.466832	1.14664	0
HIF1Alpha Pathway (Gene expression)	0.603706	-1.00227	0	0
HIF1Alpha Pathway (HIF1alpha degradation)	0.450838	0.00677065	-0.457727	0
HIF1Alpha Pathway (NOS pathway)	0.603706	1.72863	0.521026	0
HIF1Alpha Pathway (p53 Hypoxia pathway)	0.450838	1.03254	0.415749	0
HIF1Alpha Pathway (Pyruvate)	0.603706	-1.00227	0	0
HIF1Alpha Pathway (VEGF pathway)	2.34126	-0.175685	-0.882923	0
Hypoxia pathway EMT 1	-0.976003	-2.13773	-1.33616	0.52165
Hypoxia pathway EMT 2	-0.976003	-2.13773	-1.33616	0.52165
Hypoxia pathway EMT 3	-0.976003	-2.13773	-1.33616	0.52165
Hypoxia pathway EMT 4	-0.976003	-2.13773	-1.33616	0.52165
IGF1R Main Pathway	2.21074	12.2409	5.18796	0.884474
IGF1R Signaling Pathway (Cell survival)	1.02231	-1.09332	2.71918	0
IGF1R Signaling Pathway (Glucose uptake)	0	2.4771	0	0
IGF1R Signaling Pathway (Glycogen synthesis)	-0.546589	-0.682068	0.40859	0
IGF1R Signaling Pathway (IKB degradation)	0.660893	1.88295	1.96637	0
IGF1R Signaling Pathway (Protein synthesis)	1.47125	3.4578	-0.447011	0
IL-10 Main Pathway	1.75791	3.98961	0.912009	-0.450972
IL-10 Pathway (Gene expression)	1.43985	4.41542	1.90797	0
IL-10 Pathway (Stability determination)	0.338536	0.754984	0.216383	0
IL-10 Pathway (Translational modulation)	-0.127318	0.581894	-0.317873	0
IL-2 Main Pathway	5.94798	11.9206	6.58298	0.893474
IL-2 Pathway (Actin reorganization)	1.28509	4.07346	0.798457	0
IL-2 Pathway (Apoptosis)	0.864183	2.32538	0.444206	0
IL-2 Pathway (Apoptosis inhibition)	1.31425	6.79415	1.35557	0
IL-2 Pathway (Protein synthesis)	0.450065	4.07346	0.798457	0
IL-6 Main Pathway	3.81208	2.6297	-1.6685	-0.86084
ILK Main Pathway	12.1692	36.2384	14.6573	-3.99393
ILK Pathway (Apoptosis)	1.9057	5.24829	7.471	-2.97983
ILK Pathway (Cell adhesion, cell motility, opsonization)	1.28154	0.588256	6.41383	-2.97983
ILK Pathway (Cell cycle proliferation)	2.14572	5.41422	7.471	-2.97983
ILK Pathway (Cell migration, retraction)	0.368678	0.0586413	6.41383	-2.97983
ILK Pathway (Cell motility)	2.19343	12.8846	8.30976	-4.21147
ILK Pathway (Cytoskeletal reorganization)	1.83007	4.44273	7.82058	-1.30308
ILK Pathway (G2-phase arrest)	2.14572	5.41422	7.471	-2.97983
ILK Pathway (Induced cell proliferation)	3.98399	4.77856	2.42972	-0.475913
ILK Pathway (Regulation of intermediate filaments)	1.28154	1.90951	6.41383	-2.97983
ILK Pathway (Regulation of junction assembly of desmosomes)	1.28154	0.588256	6.41383	-2.97983
ILK Pathway (Wound healing)	1.28154	1.11981	6.41383	-2.97983
Integrin SIgnaling Main Pathway	1.92367	6.45311	7.41697	-1.1324
Integrin SIgnaling Pathway (Cell survival)	2.51752	10.77	2.57531	0.779659
Integrin SIgnaling Pathway (Cytoskeleton contraction integrin modulation cell invasion and migration)	1.2638	-1.62196	0.729818	0.442457
Integrin SIgnaling Pathway (Focal adhesion and stress fibers)	-0.080299	-1.81136	-1.08369	0
Integrin SIgnaling Pathway (Translocation to the nucleus)	-1.41551	-0.0325199	0.550746	0.492109
Interactions Report	-1.47412	-2.60272	-0.676001	0.52165
Interferon Main Pathway	1.06003	19.5795	3.12549	0.0967019
Interferon Pathway (Gene expression)	1.31182	7.4949	2.23574	0
Interferon Pathway (Transcription)	0.820989	2.68175	0	0
Interferon Pathway (Translation)	0.520592	1.17315	-0.419985	0
IP3 Main Pathway	-0.25834	18.1318	5.75382	-2.13749
IP3 Pathway (Gene expression)	-0.46346	-1.98196	3.56785	0
JAK mStat Main Pathway	3.0331	8.04978	-0.349104	1.32798
JAK mStat Pathway (Akt pathway)	5.44322	13.0675	1.62169	-0.39347
JAK mStat Pathway (JAK degradation)	1.28501	10.3805	-0.231166	-0.159833
JNK Main Pathway	8.98684	15.8794	5.1327	0.120921
JNK Pathway (Apoptosis, Inflammation, Tumorigenesis, Cell Migration)	2.04907	-1.40679	0.94081	-0.0249404
JNK Pathway (Insulin signaling)	-0.58753	-3.0248	1.42366	0
MAPK Family Main Pathway	10.6124	10.8993	9.94303	-0.766827
MAPK Family Pathway (Chromatin Remodeling)	1.78554	5.01776	0.543396	0
MAPK Family Pathway (Cytoskeleton)	0.527547	-0.769473	0	0
MAPK Family Pathway (Gene Expression)	3.5008	4.13455	3.65872	0
MAPK Family Pathway (IKBs Degradation)	0.660893	0.439998	2.52615	0
MAPK Family Pathway (Translation)	0	-0.574941	0	0
MAPK Signaling Main Pathway	16.0085	39.73	10.4345	-1.84281
MAPK Signaling Pathway (Cell Survival, Inflammation, Apoptosis, Osmoregulation)	4.23076	1.29367	-1.03938	-0.0249404
MAPK Signaling Pathway (Gene Expression)	6.31535	6.66475	2.50247	0.101141
DDR pathway (MMR)	2.53781	2.66607	-1.01016	0
Mismatch Repair Main Pathway	3.23165	5.28003	-0.429079	0
Mitochondrial Apopotosis Main Pathway	-5.85346	-14.9073	-2.72892	-0.0877978
Mitochondrial Apopotosis Pathway (Apoptosis)	-0.532538	-0.252406	0.612969	0
Mitochondrial Apopotosis Pathway (Depolarization)	0.414198	0.674247	0	0
Mitochondrial Apopotosis Pathway (DNA fragmentation)	0.497012	-2.17659	-1.49444	0.402975
Mitochondrial Apopotosis Pathway (Gene expression)	0.850701	0.674247	0	0
mTOR Main Pathway	7.53492	29.0026	2.51304	0.629473
mTOR Pathway (Actin organization)	0.02974	2.33515	0.499519	1.67675
mTOR Pathway (Akt signaling)	0	1.64408	0	0
mTOR Pathway (Scanning)	0.19073	-0.574837	0.0688432	-1.03274
mTOR Pathway (Translation on)	-0.329861	1.12676	-0.351142	-1.03274
mTOR Pathway (VEGF pathway)	-0.498121	0.162214	0	0
NGF (Negative) Main Pathway	-0.72797	-0.217139	1.53457	0
NGF (Negative) Pathway (Apoptosis)	-0.72797	0.598981	1.36477	0
NGF (Positive) Main Pathway	3.79138	7.90432	3.13895	3.48944
NHEJ mechanisms of DSBs repair effect	-0.140843	1.12478	0.985844	0
Notch Main Pathway	0.550762	5.93344	-0.835629	0.530797
DDR Pathway (NER)	3.39539	6.06204	0.062535	-0.433398
p38 (Negative) Main Signaling Pathway	10.7473	23.5021	7.84653	-1.47795
p38 (Positive) Main Signaling Pathway	10.7473	24.1505	7.84653	-1.47795
p53 Signaling (Negative) Main Pathway	3.15176	6.00671	0.350685	1.46926
p53 Signaling (Negative) Pathway (p53 Degradation)	0.612978	5.42058	0.970294	-0.578982
PAK Main Pathway	8.34286	18.2438	6.06851	-2.40726
PAK Pathway (Actin Cytoskeleton)	4.37409	8.97755	4.59663	-0.40481
PAK Pathway (Myosin Activation)	-0.00939722	6.82026	1.80452	-1.23164
PPAR Main Pathway	-0.471293	8.13298	4.0302	-1.23297
PTEN Main Pathway	-2.99372	-7.68337	1.00091	-1.77044
RANK Signaling in Osteoclast Main Pathway	3.03106	4.05013	5.05472	1.03682
RANK Signaling in Osteoclast Pathway (IKBs Degradation)	0.660893	0.0415191	2.93384	0.488501
RAS Main Pathway	5.647	43.6843	3.31276	-1.21424
Telomere Main Pathway	-2.73889	-6.6996	2.14392	-1.5922
RNA Polymerase II Complex Pathway	3.38548	7.37752	0.688158	0.689648
Cell Cycle Pathway (SCC during S-phase)	2.41422	9.97773	0.857946	-0.556638
SMAD (Negative) Main Pathway	0.496338	-10.8025	2.58862	-0.0615934
SMAD (Negative) Pathway (Degradation)	-0.151642	-4.47319	2.45637	1.14973
SMAD (Positive) Main Pathway	0.496338	-10.8025	2.58862	-0.0615934
SMAD (Positive) Pathway (Degradation)	-0.151642	-4.47319	2.45637	1.14973
Cell Cycle Pathway (Metaphase-Anaphase)	0.470388	-3.37462	1.82573	-0.94618
Cell Cycle Pathway (Origin of S-phase)	3.31549	-1.03424	-1.65341	0
STAT3 Main Pathway	6.31315	-2.42716	3.85026	2.51447
TGF beta Main Pathway	9.86151	10.6024	3.05495	-0.873345
TGF beta Pathway (Epithelial mesehchymal transition)	-0.308302	3.3272	2.31606	0
TGF beta Pathway (Post-transcriptional G1 arrest)	-1.17248	-0.113983	1.25889	0
TGF beta Pathway (SnON degradation)	-0.466042	-1.32544	0.414218	0
TGF beta Pathway (Tumor suppression)	0	0.0135618	-0.468696	0
TGF beta Pathway (Tumorigenesis)	0	0.0135618	-0.468696	0
TNF (Negative) Main Pathway	-0.4028	-1.7594	0.442304	0.444983
TNF (Negative) Pathway (Apoptosis)	-0.4028	-1.95765	0.909036	0.444983
TNF (Positive) Main Pathway	2.52961	-2.22299	2.43209	0.444983
TNF (Positive) Pathway (Gene expression, Cell survival)	1.31822	-1.25615	3.10363	0
TNF (Positive) Pathway (IKBs degradation)	0.660893	-1.11125	3.10363	0
TRAF (Negative) Main Pathway	-0.0792131	1.59071	0.479435	0
TRAF (Negative) Pathway (IKBs Degradation)	0.660893	-0.0681416	1.90734	0
TRAF (Positive) Main Pathway	3.58589	7.62467	3.77371	1.02031
TRAF (Positive) Pathway (IKBs Degradation)	0.660893	-0.0681416	1.90734	0
Transcription of mRNA Pathway	4.06112	6.36542	0.688158	0.689648
Cell Cycle Pathway (End of S-phase)	-0.387432	4.33221	2.19579	0
Translation Regulation of EIF4F activity	1.12399	5.12804	1.88039	0.0301597
Ubiquitin Proteasome Main Pathway	1.98262	-0.952828	7.8703	3.11215
Ubiquitin Proteasome Pathway (Degraded Protein)	0.817031	1.17355	2.03527	2.69096
VEGF Main Pathway	4.28379	6.1761	-0.923203	1.32798
VEGF Pathway (Actin Reorganization)	3.76582	6.13815	-0.445584	0
VEGF Pathway (Nitric Oxide Production)	0	-0.0868094	0.521026	0
Wnt Main Pathway	4.51828	17.577	10.7226	-2.81236
Wnt Pathway (Ctnn-b Degradation)	-0.451649	2.88446	0.488496	-0.578982
IL-6 Pathway (IKBs degradation)	0.660893	1.37679	1.33196	0
