# Supplementary material for: Subtype of Neuroblastoma Cells with High KIT Expression Are Dependent on KIT and Its Knockdown Induces Compensatory Activation of Pro-Survival Signaling
Source: Int J Mol Sci. 2022 Jul 13;23(14):7724. doi: 10.3390/ijms23147724 (PMC9324519; doi:10.3390/ijms23147724)
Supplement: Supplementary file 1 [file ijms-23-07724-s001.zip › Table S5.xlsx]

## Sheet: Лист1
Primer	Sequence
GAPDH pr1	GAGCCCGCAGCCTCCCGCT
GAPDH pr2	GCGCCCAATACGACCAAATC
KIT pr1	CATCATGGAGGATGACGAGT
KIT pr2	CGACCATGAGTAAGGAGGAT
NTRK1 pr1	CCATCCCTGACACTAACAGCA
NTRK1 pr2	GCACAAGGAGCAGCGTAGAA
CCNA1 pr1	GCCTCCTGTCTGGTGGGA
CCNA1 pr2	TGCAGTGCATTGCTTCAGAC
CCNB1 pr1	CCTCTCCAAGCCCAATGGAA
CCNB1 pr2	TGGTCTGACTGCTTGCTCTT
CCND1 pr1	AAGCTGTGCATCTACACCGA
CCND1 pr2	CTTGAGCTTGTTCACCAGGA
CCND2 pr1	GTTCCTGGCCTCCAAACTCA
CCND2 pr2	CTTGATGGAGTTGTCGGTGTAAAT
CCNE1 pr1	GGGAGCGGGATGCGA
CCNE1 pr2	GGGTCTGCACAGACTGCATTA
MYC pr1	TGAGGAGACACCGCCCAC
MYC pr2	CAACATCGATTTCTTCCTCATCTTC
TP53 pr1	ACCTATGGAAACTACTTCCTGAAA
TP53 pr2	CTGGCATTCTGGGAGCTTCA
CDKN1B pr1	GGCTAACTCTGAGGACACGC
CDKN1B pr2	TGGGGAACCGTCTGAAACAT
EGFR pr1	AGGAGAGGAGAACTGCCAGAA
EGFR pr2	TCTCGGAATTTGCGGCAGAC
EPOR pr1	CATCCTGACGCTCTCCCTCA
EPOR pr2	GCCTTCAAACTCGCTCTCTG
IGF1R pr1	CATCCGACGGGGGAATAACA
IGF1R pr2	GCTGCAAGTTCTGGTTGTCG
MET pr1	GCCAACCGAGAGACAAGCAT
MET pr2	AGCGATGTTGACATGCCACT
IL6R pr1	TCACAACATGGATGGTCAAGGA
IL6R pr2	TGGATTCTGTCCAAGGCGTG
